# Supplementary material
Source: PubMed Central journal article supplement (PMC5833497)
Supplement: jamaneurol-75-114-s001.pdf [file jamaneurol-75-114-s001.pdf]

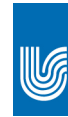

# Clinical Study Protocol

## A Phase II, Prospective, Randomized, Double-blind, Crossover Placebo-controlled Study of the symptomatic Effects of Nocturnal Sodium Oxybate in Parkinson's Disease

Short title: PD-Xyrem

**Sponsor-Investigator and Principal Investigator:** Christian Baumann (MD)  
Department of Neurology at the University Hospital  
Zurich, Frauenklinikstrasse 26, 8091 Zurich

[REDACTED]

[REDACTED]

[REDACTED]

**Study Product:** Sodium Oxybate – Xyrem

**Protocol Version and Date:** Version 1.5, 30.03.2016

[REDACTED]

[REDACTED]

## STUDY SYNOPSIS

|                                               |                                                                                                                                                                                                                                                                                                                                                                                                                                                                                |
|-----------------------------------------------|--------------------------------------------------------------------------------------------------------------------------------------------------------------------------------------------------------------------------------------------------------------------------------------------------------------------------------------------------------------------------------------------------------------------------------------------------------------------------------|
| <b>Sponsor-Investigator</b>                   | Christian Baumann (MD)                                                                                                                                                                                                                                                                                                                                                                                                                                                         |
| <b>Study Title:</b>                           | A Phase II, Prospective, Randomized, Double-blind, Crossover Placebo-controlled Study of the symptomatic Effects of Nocturnal Sodium Oxybate in Parkinson's Disease                                                                                                                                                                                                                                                                                                            |
| <b>Short Title/Study ID:</b>                  | PD-Xyrem                                                                                                                                                                                                                                                                                                                                                                                                                                                                       |
| <b>Protocol Version and Date:</b>             | [REDACTED]                                                                                                                                                                                                                                                                                                                                                                                                                                                                     |
| <b>Clinical Phase:</b>                        | Phase II                                                                                                                                                                                                                                                                                                                                                                                                                                                                       |
| <b>Methodology:</b>                           | Prospective, randomized, double-blind, crossover placebo-controlled                                                                                                                                                                                                                                                                                                                                                                                                            |
| <b>Study Duration:</b>                        | 24 months                                                                                                                                                                                                                                                                                                                                                                                                                                                                      |
| <b>Study Center(s):</b>                       | Single-center                                                                                                                                                                                                                                                                                                                                                                                                                                                                  |
| <b>Investigator(s):</b>                       | <p>Sebastian Schreglmann<br/>Department of Neurology, University Hospital Zurich<br/>[REDACTED]</p> <p>Fabian Büchele<br/>Department of Neurology, University Hospital Zurich<br/>[REDACTED]</p> <p>Esther Werth<br/>Department of Neurology, University Hospital Zurich<br/>[REDACTED]</p> <p>Angelina Maric<br/>Department of Neurology, University Hospital Zurich<br/>[REDACTED]</p> <p>Further study team members according to the updated list of study team members</p> |
| <b>Objective(s)/ Outcome(s):</b>              | <ul style="list-style-type: none"> <li>• The effect of nocturnal sodium oxybate on nocturnal sleep and excessive daytime sleepiness in PD patients</li> <li>• The effect of nocturnal sodium oxybate on motor function, cognition, fatigue and depression in PD patients</li> <li>• The effect of nocturnal sodium oxybate on quality of life of partners and caregivers</li> </ul>                                                                                            |
| <b>Number of Subjects:</b>                    | 16                                                                                                                                                                                                                                                                                                                                                                                                                                                                             |
| <b>Diagnosis and Main Inclusion Criteria:</b> | <ul style="list-style-type: none"> <li>• Moderate to severe Parkinson's disease (Hoehn&amp;Yahr II/III)</li> <li>• History of disturbed nocturnal sleep and presence of excessive daytime sleepiness (ESS &gt;10)</li> <li>• Doses of dopaminergic and other PD treatment must have been stable for at least 14 days prior to the baseline visit.</li> </ul>                                                                                                                   |

|                                                 |                                                                                                                                                                                                                                                                                                                                                                                                                                                                                                                                                                                                                                                                               |
|-------------------------------------------------|-------------------------------------------------------------------------------------------------------------------------------------------------------------------------------------------------------------------------------------------------------------------------------------------------------------------------------------------------------------------------------------------------------------------------------------------------------------------------------------------------------------------------------------------------------------------------------------------------------------------------------------------------------------------------------|
| <b>Main Exclusion Criteria:</b>                 | <ul style="list-style-type: none"> <li>• Atypical Parkinson disorder, Parkinson's disease without response to levodopa</li> <li>• Apnea-Hypopnea indices &gt;15 or oxygen saturation consistently below 90% on baseline polysomnography or diagnosed sleep-apnoe-syndrom &amp; COPD</li> <li>• Severe medical conditions such as renal insufficiency, liver failure or congestive heart failure</li> <li>• Severe dementia (MoCa &lt;24)</li> <li>• Regular use of CNS-depressant substances, melatonin and other sleep-inducing substances</li> <li>• Substance abuse / alcoholism</li> </ul>                                                                                |
| <b>Study Product, Dose, Route, Regimen:</b>     | <p>Xyrem / Sodium oxybate</p> <p>Zulassungsnummer: 57184 (Swissmedic).<br/>Zulassungsinhaber: UCB-Pharma AG, Bulle.</p> <p>Drug preparation: in liquid solution of 500mg Sodium oxybate/ml<br/>dose: 3-9g (6-18ml) per night in a split dose regime per os</p>                                                                                                                                                                                                                                                                                                                                                                                                                |
| <b>Duration of administration:</b>              | 6 weeks of sodium oxybate treatment and 6 weeks of placebo treatment in a crossover randomized order                                                                                                                                                                                                                                                                                                                                                                                                                                                                                                                                                                          |
| <b>Reference therapy, Dose, Route, Regimen:</b> | <p>Placebo</p> <p>dose: 3-9g (6-18ml) per night in a split dose regime per os</p>                                                                                                                                                                                                                                                                                                                                                                                                                                                                                                                                                                                             |
| <b>Study Schedule:</b>                          | <p>Month Year of First-Subject-In (planned): 01.08.2013</p> <p>Month Year of Last-Subject-Out (planned): 01.08.2015</p>                                                                                                                                                                                                                                                                                                                                                                                                                                                                                                                                                       |
| <b>Statistical Methodology:</b>                 | <p>Group data will be described by means and standard deviations. For normally distributed values, the significance of differences in means will be assessed by independent Student t-test, Pearson correlation analyses, one-way ANOVA, and repeated-measures ANOVA (IBM SPSS Statistics, 21 for Windows), where appropriate. ANOVA will be followed by post hoc comparisons to determine group differences. For non-normally distributed values, we will apply U Mann-Whitney tests, and Spearman correlation analyses. We will use multinomial regression to assess the influence of cofactors on endpoints. The significance level will be set at p values &lt; 0.05.</p> |
| <b>GCP Statement:</b>                           | This study will be conducted in compliance with the protocol, the current version of the Declaration of Helsinki, and ICH-GCP as well as all national legal and regulatory requirements.                                                                                                                                                                                                                                                                                                                                                                                                                                                                                      |

## STUDY SCHEDULE

| Study arm 1                                                          | Screening        | Base-line | Study drug 1 |    |    |    |    |    |
|----------------------------------------------------------------------|------------------|-----------|--------------|----|----|----|----|----|
|                                                                      |                  |           | 7            | 14 | 21 | 28 | 35 | 42 |
| Day                                                                  |                  | 0         |              |    |    |    |    |    |
| Visit                                                                | 0                | 1         |              | 2  |    | 3  |    | 4  |
| Telephone call                                                       |                  |           | x            |    | x  |    | x  |    |
| Subject Information and Informed Consent                             | x                |           |              |    |    |    |    |    |
| Demographics                                                         | x                |           |              |    |    |    |    |    |
| Medical History                                                      | x                |           |              |    |    |    |    |    |
| In- /Exclusion Criteria                                              |                  | x         |              |    |    |    |    |    |
| Concomitant Therapy                                                  | x                | x         | x            | x  | x  | x  | x  | x  |
| Levodopa Test                                                        |                  | x         |              |    |    |    |    | x  |
| Pregnancy Test                                                       | (x) <sup>1</sup> |           |              |    |    |    |    |    |
| Randomization                                                        |                  | x         |              |    |    |    |    | x  |
| UPDRS III, PDSS-2, UPDRS II, PDQ-39, HADS, MoCA, FSS, QUIP-RS, RBDSQ |                  | x         |              |    |    |    |    | x  |
| Partner/Caregiver: ZBCI                                              |                  | x         |              |    |    |    |    | x  |
| Blood Test                                                           |                  | x         |              |    |    |    |    | x  |
| Sleep Laboratory Tests                                               |                  | x         |              |    |    |    |    | x  |
| Start Actigraphy                                                     | x                |           |              |    |    | x  |    |    |
| Return Actigraphy                                                    |                  | x         |              |    |    |    |    | x  |
| Clinical Assessment                                                  |                  | x         |              | x  |    | x  |    | x  |
| Vital Signs                                                          |                  | x         |              | x  |    | x  |    | x  |
| ESS                                                                  | x                | x         |              | x  |    | x  |    | x  |
| Review of Medical Adherence                                          |                  |           | x            | x  | x  | x  | x  | x  |
| Adjustment of Study Medication Dosage                                |                  |           | x            | x  | x  | x  | x  |    |
| Adverse Events                                                       |                  |           | x            | x  | x  | x  | x  | x  |

<sup>1</sup> In women who are not surgically sterilized/hysterectomized or post-menopausal for longer than 2 years

| Study arm 2                                                                   | washout | Baseline 2 | Study drug 2 |    |    |    |    |                  |
|-------------------------------------------------------------------------------|---------|------------|--------------|----|----|----|----|------------------|
| Day                                                                           | 43-55   | 56         | 63           | 70 | 77 | 84 | 91 | 98               |
| Visit                                                                         |         | 5          |              | 6  |    | 7  |    | 8                |
| Telephone call                                                                |         |            | x            |    | x  |    | x  |                  |
| Concomitant Therapy                                                           |         | x          | x            | x  | x  | x  | x  | x                |
| Levodopa Test                                                                 |         | x          |              |    |    |    |    | x                |
| Pregnancy Test                                                                |         |            |              |    |    |    |    | (x) <sup>1</sup> |
| UPDRS III, PDSS-2,<br>UPDRS II, PDQ-39,<br>HADS, MoCA, FSS,<br>QUIP-RS, RBDSQ |         | x          |              |    |    |    |    | x                |
| Partner/Caregiver:<br>ZBCI                                                    |         | x          |              |    |    |    |    | x                |
| Blood Test                                                                    |         | x          |              |    |    |    |    | x                |
| Sleep Laboratory<br>Tests                                                     |         | x          |              |    |    |    |    | x                |
| Start Actigraphy                                                              | x       |            |              |    |    | x  |    |                  |
| Return Actigraphy                                                             |         | x          |              |    |    |    |    | x                |
| Clinical Assessment                                                           |         | x          |              | x  |    | x  |    | x                |
| Vital Signs                                                                   |         | x          |              | x  |    | x  |    | x                |
| ESS                                                                           |         | x          |              | x  |    | x  |    | x                |
| Review of Medical<br>Adherence                                                |         |            | x            | x  | x  | x  | x  | x                |
| Adjustment of Study<br>Medication Dosage                                      |         |            | x            | x  | x  | x  | x  |                  |
| Adverse Events                                                                |         |            | x            | x  | x  | x  | x  | x                |

<sup>1</sup> In women who are not surgically sterilized/hysterectomized or post-menopausal for longer than 2 years

## TABLE OF CONTENTS

|   |                                                                        |    |
|---|------------------------------------------------------------------------|----|
| 1 | LIST OF ABBREVIATIONS AND DEFINITIONS OF TERMS.....                    | 8  |
| 2 | INVESTIGATORS AND STUDY ADMINISTRATIVE STRUCTURE.....                  | 10 |
| 3 | ETHICS.....                                                            | 12 |
|   | 3.1 Independent Ethics Committee (IEC) and Regulatory Authorities..... | 12 |
|   | 3.2 Ethical Conduct of the Study.....                                  | 12 |
|   | 3.3 Subject Information and Informed Consent.....                      | 12 |
| 4 | INTRODUCTION.....                                                      | 13 |
|   | 4.1 Background and Rationale.....                                      | 13 |
|   | 4.2 Investigational Product.....                                       | 13 |
|   | 4.3 Clinical Data to Date.....                                         | 13 |
|   | 4.4 Dose Rationale.....                                                | 14 |
|   | 4.5 Risk/Benefits and Ethical Considerations.....                      | 15 |
| 5 | STUDY OBJECTIVES AND OUTCOMES.....                                     | 15 |
|   | 5.1 Primary Variable(s).....                                           | 16 |
|   | 5.2 Secondary Variables.....                                           | 16 |
| 6 | STUDY DESIGN AND COURSE OF STUDY.....                                  | 20 |
|   | 6.1 General Design.....                                                | 20 |
|   | 6.2 Visit 0 (Screening): during normal routine visits.....             | 20 |
|   | 6.3 Visit 1 (Randomization and baseline; day 0).....                   | 20 |
|   | 6.4 First drug (cross-over design).....                                | 21 |
|   | 6.5 Wash-out period.....                                               | 22 |
|   | 6.6 Second baseline day 49 (Visit 5).....                              | 22 |
|   | 6.7 Second drug (cross-over design).....                               | 22 |
| 7 | SUBJECT SELECTION AND WITHDRAWAL.....                                  | 23 |
|   | 7.1 Inclusion Criteria.....                                            | 23 |
|   | 7.2 Exclusion Criteria.....                                            | 23 |
|   | 7.3 Subject Recruitment and Screening.....                             | 24 |
|   | 7.4 Early Withdrawal of Subjects.....                                  | 25 |
|   | 7.4.1 Criteria for Early Withdrawal of Subjects.....                   | 25 |
|   | 7.4.2 Data Collection and Follow-up for Withdrawn Subjects.....        | 25 |
|   | 7.5 Early Termination of Study.....                                    | 25 |
| 8 | TREATMENTS.....                                                        | 26 |
|   | 8.1 Treatments to be Administered.....                                 | 26 |
|   | 8.2 Identity of Investigational Product(s).....                        | 26 |
|   | 8.3 Method of Assigning Subjects to Treatment Groups.....              | 27 |
|   | 8.4 Treatment Compliance.....                                          | 27 |
|   | 8.5 Prior and Concomitant Therapy.....                                 | 27 |
|   | 8.6 Packaging, Labelling and Supply.....                               | 27 |
|   | 8.7 Blinding.....                                                      | 28 |
|   | 8.8 Storage Conditions.....                                            | 28 |
|   | 8.9 Study Drug Accountability.....                                     | 28 |

|    |                                                               |    |
|----|---------------------------------------------------------------|----|
|    | 8.10 Return or Destruction of Study Drug.....                 | 28 |
| 9  | STUDY PROCEDURES.....                                         | 28 |
|    | 9.1 Screening.....                                            | 29 |
|    | 9.2 Assessment visits .....                                   | 29 |
|    | 9.3 Visits during the course of study medication intake ..... | 30 |
|    | 9.4 SAFETY .....                                              | 30 |
|    | 9.5 Definition of (Serious) Adverse Events .....              | 30 |
|    | 9.6 Recording of (Serious) Adverse Events.....                | 32 |
|    | 9.7 Assessment of (Serious) Adverse Events.....               | 32 |
|    | 9.8 Reporting of Serious Adverse Events .....                 | 33 |
|    | 9.9 Follow up of (Serious) Adverse Events.....                | 35 |
| 10 | DATA QUALITY ASSURANCE.....                                   | 35 |
|    | 10.1 Routine Monitoring.....                                  | 35 |
|    | 10.2 Audits and Inspections.....                              | 36 |
|    | 10.3 Specification of Source Documents .....                  | 36 |
| 11 | STATISTICS .....                                              | 37 |
|    | 11.1 Statistical and Analytical Plans .....                   | 37 |
|    | 11.2 Hypotheses .....                                         | 37 |
|    | 11.3 Handling of Missing Data .....                           | 37 |
|    | 11.4 Determination of Sample Size .....                       | 38 |
| 12 | DATA HANDLING AND RECORD KEEPING .....                        | 38 |
| 13 | CONFIDENTIALITY .....                                         | 39 |
| 14 | INSURANCE .....                                               | 39 |
| 15 | STUDY REGISTRATION .....                                      | 40 |
| 16 | PUBLICATION POLICY .....                                      | 40 |
| 17 | SIGNATURES .....                                              | 41 |
| 18 | REFERENCES.....                                               | 42 |
| 19 | APPENDIX .....                                                | 43 |

## 1 LIST OF ABBREVIATIONS AND DEFINITIONS OF TERMS

|        |                                           |
|--------|-------------------------------------------|
| AASM   | American Academy of Sleep Medicine        |
| AE     | Adverse Event                             |
| AHI    | Apnea-Hypopnea-Index                      |
| ALT    | Alanine Aminotransferase                  |
| AP     | Alkaline Phosphatase                      |
| CNS    | Central Nervous System                    |
| eCRF   | Electronic Case Report Form               |
| CRP    | C-Reactive Protein                        |
| CTC    | Clinical Trials Center                    |
| ECG    | Electrocardiography                       |
| EDS    | Excessive Daytime Sleepiness              |
| EEG    | Electroencephalography                    |
| EMG    | Electromyography                          |
| EOG    | Electrooculography                        |
| ESS    | Epworth Sleepiness Scale                  |
| FSS    | Fatigue Severity Scale                    |
| GCP    | Good Clinical Practice                    |
| GGT    | Gamma-glutamyl Transferase                |
| HADS   | Hospital Anxiety and Depression Scale     |
| IB     | Investigator's Brochure                   |
| ICH    | International Conference on Harmonization |
| IEC    | Independent Ethics Committee              |
| ISF    | Investigator Site File                    |
| KAZ    | Kantonsapotheke Zürich                    |
| MoCA   | Montreal Cognitive Assessment             |
| MSLT   | Multiple Sleep Latency Test               |
| PD     | Parkinson's Disease                       |
| PDQ-39 | Parkinson's Disease Questionnaire         |
| PDSS-2 | Parkinson's Disease Sleep Scale           |
| PI     | Principal Investigator                    |
| PLM    | Periodic Limb Movement                    |
| PSG    | Polysomnography                           |
| PVT    | Psychomotor Vigilance Test                |



|         |                                                                                      |
|---------|--------------------------------------------------------------------------------------|
| QUIP-RS | Questionnaire for Impulsive-Compulsive Disorders in Parkinson's Disease-Rating Scale |
| RBDSQ   | REM Sleep Behavior Disorder Screening Questionnaire                                  |
| SAE     | Serious Adverse Event                                                                |
| SAR     | Serious Adverse Reaction                                                             |
| SART    | Sustained Attention to Response Test                                                 |
| SDV     | Source Data Verification                                                             |
| SOP     | Standard Operating Procedure                                                         |
| SUSAR   | Suspected Unexpected Serious Adverse Reaction                                        |
| TMF     | Trial Master File                                                                    |
| TSH     | Thyroid-stimulating Hormone                                                          |
| UPDRS   | Unified Parkinson's Disease Rating Scale                                             |
| USZ     | University Hospital Zurich                                                           |
| ZBCI    | Zarit Burden of Caregiver Interview (deutsche Version)                               |

## 2 INVESTIGATORS AND STUDY ADMINISTRATIVE STRUCTURE

|                                                           |                                                                                                                                                                                                                                                                                                                                                                                                                                                                                                                                                                                               |
|-----------------------------------------------------------|-----------------------------------------------------------------------------------------------------------------------------------------------------------------------------------------------------------------------------------------------------------------------------------------------------------------------------------------------------------------------------------------------------------------------------------------------------------------------------------------------------------------------------------------------------------------------------------------------|
| <p>Sponsor-Investigator<br/>(Principal Investigator):</p> | <p>Christian Baumann (MD)<br/>Department of Neurology at the University<br/>Hospital Zurich<br/>Frauenklinikstrasse 26<br/>8091 Zurich<br/>[REDACTED]</p>                                                                                                                                                                                                                                                                                                                                                                                                                                     |
| <p>Study Site(s):</p>                                     | <p>Department of Neurology at the University<br/>Hospital Zurich<br/>Frauenklinikstrasse 26<br/>8091 Zurich<br/>[REDACTED]</p>                                                                                                                                                                                                                                                                                                                                                                                                                                                                |
| <p>Investigator(s):</p>                                   | <p>Sebastian Schreglmann<br/>Department of Neurology at the University<br/>Hospital Zurich<br/>Frauenklinikstrasse 26<br/>8091 Zurich<br/>[REDACTED]</p> <p>Fabian Büchele<br/>Department of Neurology at the University<br/>Hospital Zurich<br/>Frauenklinikstrasse 26<br/>8091 Zurich<br/>[REDACTED]</p> <p>Esther Werth<br/>Department of Neurology at the University<br/>Hospital Zurich<br/>Frauenklinikstrasse 26<br/>8091 Zurich<br/>[REDACTED]</p> <p>Angelina Maric<br/>Department of Neurology at the University<br/>Hospital Zurich<br/>Frauenklinikstrasse 26<br/>8091 Zurich</p> |

|             |                                                                                                                                                                                            |
|-------------|--------------------------------------------------------------------------------------------------------------------------------------------------------------------------------------------|
|             | 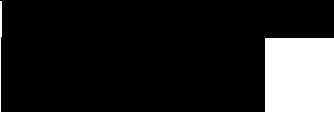<br>Further study team members according to the updated list of study team members                       |
| Laboratory: | Institute of Clinical Chemistry at the University Hospital Zurich<br>Raemistrasse 100<br>8091 Zurich<br> |

### **3 Ethics**

#### **3.1 Independent Ethics Committee (IEC) and Regulatory Authorities**

Before this study will be conducted, the protocol, the proposed subject information and consent form as well as other study-specific documents will be submitted to a properly constituted Independent Ethics Committee (IEC) and regulatory authorities (Swissmedic) in agreement with local legal requirements, for formal approval. Any amendment to the protocol must be approved by these institutions.

The decision of the IEC and Swissmedic concerning the conduct of the study will be made in writing to the Sponsor-Investigator before commencement of this study.

#### **3.2 Ethical Conduct of the Study**

The study will be carried out in accordance with principles enunciated in the current version of the Declaration of Helsinki, the guidelines of Good Clinical Practice (GCP) issued by International Conference on Harmonization (ICH), and Swiss regulatory authority's requirements.

IEC and regulatory authority will receive annual safety and interim reports and be informed about study stop/ end in agreement with local requirements.

#### **3.3 Subject Information and Informed Consent**

The investigator must explain to each subject the nature of the study, its purpose, the procedures involved, the expected duration, the potential risks and benefits and any discomfort it may entail. Each subject must be informed that the participation in the study is voluntary and that he/she may withdraw from the study at any time and that withdrawal of consent will not affect his/her subsequent medical treatment.

The subject must be informed that his/her medical records may be examined by authorized individuals other than their treating physician.

All subjects for this study will be provided a subject information sheet and a consent form describing this study and providing sufficient information for subjects to make an informed decision about their participation in this study.

The subject information sheet and the consent form will be submitted with the protocol for review and approval for the study by the IEC and by Swissmedic. The formal consent of a subject, using the approved consent form, must be obtained before that subject is submitted to any study procedure.

The subject should read and consider the statement before signing and dating the informed consent form, and should be given a copy of the signed document. The consent form must also be signed and dated by the investigator (or his designee) and it will be retained as part of the study records.

## 4 INTRODUCTION

This document is a protocol for a human research study.

### 4.1 Background and Rationale

Non-motor symptoms as excessive daytime sleepiness (EDS) are markedly impairing quality of life in Parkinson's Disease (PD) patients. Beside the disturbing character of these symptoms, EDS for example is also linked to a decrease in cognitive abilities or mood, i.e. depression [1,2]. The most prominent cause for EDS is a disruption of nocturnal sleep [3]. Furthermore disrupted nocturnal sleep is also likely influencing quality of life of partners or caregivers. This aspect of non-motor symptoms has not been investigated in detail so far. In conclusion, we are firmly convinced that the improvement of nocturnal sleep in PD patients is a promising potential strategy to reduce several symptoms and adverse events in PD patients and their partners or caregivers. Moreover, sleep modulation is a recently introduced approach of potential neuroprotective strategies, e.g. since sleep deprivation was linked with neurodegenerative processes in the brain [4,5].

It has already been shown in a recent study that the nocturnal application of sodium oxybate in PD patients is not only improving nocturnal sleep quality, but is accompanied by a reduction in EDS [6]. There were, however, significant methodological limitations to this study, since it was a single-arm, open-label, uncontrolled study.

In summary, the nocturnal application of sodium oxybate seems to be a promising treatment for PD patients, but methodologically correct evidence is still lacking.

### 4.2 Investigational Product

The investigational product used in this study is Xyrem, which was approved by Swissmedic in June 2006 for the treatment of cataplexies in patients with narcolepsy. Xyrem belongs to the class of sedatives. The chemical name for sodium oxybate is sodium 4-hydroxybutyrate and its molecular formula is  $C_4H_7NaO_3$ . Xyrem oral solution contains 500 mg of sodium oxybate per milliliter of USP Purified Water, neutralized to pH 7.5 with malic acid. It has to be taken orally at night in a split dose regime. It is eliminated mainly by metabolism with a half-life of 0.5 to 1 hour. Pharmacokinetics are nonlinear with blood levels increasing 3.8-fold as dose is doubled from 4.5 to 9 g. The pharmacokinetics are not altered with repeat dosing.

The exact mechanism of Xyrem is unknown. However, Xyrem is enhancing deep sleep and therefore strengthening nocturnal sleep. Since disturbed nocturnal sleep and EDS are major non-motor symptoms in patients suffering from PD we aim to investigate the profit of Xyrem application for PD patients (for detailed information see *Arzneimittel-Kompendium der Schweiz* 2012).

### 4.3 Clinical Data to Date

An uncontrolled open-label study administered nocturnal sodium oxybate for excessive daytime sleepiness in PD [6]. No other tested treatment so far – be it stimulants, be it continuous dopaminergic stimulation overnight – has yielded such a dramatic

improvement of EDS: mean Epworth sleepiness scale values dropped down from 15.6 points (severe sleepiness, comparable to patients with narcolepsy) to 9.0 (normal values) (Table 1). In addition, sleep quality and fatigue improved as well.

| Instrument | Mean (SD) Score               |                              | P Value |
|------------|-------------------------------|------------------------------|---------|
|            | Before Sodium Oxybate Therapy | After Sodium Oxybate Therapy |         |
| ESS        | 15.6 (4.2)                    | 9.0 (5.0)                    | <.001   |
| PSQI       | 10.9 (4.0)                    | 6.6 (3.9)                    | <.001   |
| FSS        | 42.9 (13.2)                   | 36.3 (14.3)                  | <.001   |
| SF-36      | 95.7 (7.1)                    | 92.3 (5.1)                   | .71     |

Table 1. Results from the study of Ondo and colleagues (2008). Abbreviations: ESS, Epworth Sleepiness Scale; FSS, Fatigue Severity Scale; PSQI, Pittsburgh Sleep Quality Inventory; SF-36, 36-Item Short Form Health Survey. <sup>a</sup> Findings are reported for 28 subjects.

In terms of safety, the Apnea-Hypopnea-Index (AHI) went up from 7 to 13, but oxygen saturations remained stable on sodium oxybate [6]. There were, however, significant methodological limitations to this study. First, it was open-label, and second, excessive daytime sleepiness was assessed only by subjective measures, i.e. with validated questionnaires.

#### 4.4 Dose Rationale

The standard maximal dose, corresponding to the maximal dose used in this study, is 9g (corresponds to 18ml) per night in a split dose regime. As Xyrem is approved for long-term use and is only applied over 6 weeks in the current study, no specific precautions concerning the duration of intake has to be done.

The exclusion criteria in the present study meet the contraindications in case of Xyrem application listed by Swissmedic: subjects are not included in case of pregnancy, application of other CNS sedative drugs (opioids, barbiturates), severe medical conditions as liver failure, renal insufficiency, congestive heart failure and severe depression.

As most drugs, Xyrem can potentially and in few cases lead to several adverse events. Since the maximal dose is also accompanied by a higher occurrence of adverse events, the initial dose is set at 3g per night, which is even below the suggested starting dose according to the “Arzneimittelcompendium” and is carefully and stepwise increased to the individual optimal dose carefully. The key feature of a safe application is accurate monitoring of the patients, which is warranted with regular visits and phone calls in the present study.

Xyrem has been associated with potential breathing depression. In the study of Ondo et al. [6] total apneas mildly increased after the application of nocturnal sodium oxybate, whereas oxygen de-/saturation values remained stable. Nevertheless, subjects with

elevated AHI or low oxygen saturation are not included in the present study (see exclusion criteria section 7.2). However, AHI will be measured before and after drug application in all subjects, allowing a better evaluation of this aspect in the future.

Up to date, there is no approved medication for sleep disturbances or EDS in PD. So far, the application of nocturnal sodium oxybate has revealed the largest improvements in PD patients. Modafinil or Rivotril have been demonstrated to have some benefits on EDS or sleep in PD patients. However, these medications are not really an alternative treatment since the effects are only moderate and the experience of their application in PD patients is still insufficient.

#### **4.5 Risk/Benefits and Ethical Considerations**

Xyrem is a drug licensed by the FDA and Swissmedic for the use in patients with narcolepsy, and its tolerability in clinical practice is very good. It is known that the use of Xyrem leads to an improvement of the quality of nocturnal sleep in patients suffering from narcolepsy, reducing EDS. In dealing with patients it is well known that sleep disturbances of any kind (endogenous as well as exogenous) impair daytime vigilance and at the same time quality of life. It is known that non-motor symptoms of PD, i.e. EDS, have a major impact on the quality of life of patients – as well as their carers. Improving nocturnal sleep would therefore be a promising possibility to enhance the patients' daytime wellbeing.

In addition to the mentioned symptomatic effect on EDS, sleep modulation might in the future emerge as a potential disease modulating strategy. Experimental animal data have shown an aggravation of neurodegenerative disease with sleep restriction (6) – it is currently under investigation if sleep modulation can work the opposite way as well.

Thereby the controlled risk of the mentioned adverse events in section 4.5 must be seen in relation to the potential benefit of improved quality of life of patients and carers as well as its potential influence on motor and non-motor symptoms and long-term disease modification.

## **5 STUDY OBJECTIVES AND OUTCOMES**

The purpose of this study is to evaluate the effect of Xyrem on EDS compared to placebo in patients with PD. Furthermore we aim to examine the effects of Xyrem on other non-motor and motor symptoms, as well as the quality of life of the patients' caregiver or partners.

### **Primary Outcome**

To assess the efficacy of Xyrem on decreasing EDS in PD patients as measured by mean latencies in the Multiple Sleep Latency Test (MSLT).

### **Secondary Outcomes**

To assess the efficacy of Xyrem on other motor and non-motor symptoms in PD patients as measured by subjective and objective tests and questionnaires (see section 5.2).

To assess the effect of Xyrem on the quality of life in partners or caregivers of PD patients as measured by a subjective questionnaire.

To assess the safety and tolerability of Xyrem in patients with PD.

### 5.1 Primary Variable(s)

**Objective EDS**, measured by mean latencies in the MSLT, after 6 weeks of treatment with Xyrem compared to 6 weeks of placebo treatment. After the patients spent a night in the sleep laboratory at the clinic for neurology of the University Hospital Zurich, all patients will be offered 4 sleep opportunities every 2 hours, objectively measuring EDS under standard conditions in the absence of external alerting factors [7]. Mean sleep latencies (defined as the time from light-off to the first epoch of any sleep stage) will be assessed.

#### Primary Safety Variable

As our primary safety variable we will assess the **AHI** before and after treatment with sodium oxybate by overnight polysomnography (procedures see section 5.2).

### 5.2 Secondary Variables

**Motor function:** Part III of the Unified Parkinson's Disease Rating Scale (UPDRS) will be used to assess motor functions in PD in ON & OFF state (see Appendix).

**Subjective quality of nocturnal sleep** will be assessed by the Parkinson's Disease Sleep Scale (PDSS-2) and the REM Sleep Behavior Disorder Screening Questionnaire (RBDSQ) in German (see Appendix). Additional questions about the change in symptoms are added to the RBDSQ and PDSS-2 (only to be filled out at visit 4 & 8).

**Objective quality of nocturnal sleep including breathing indices** will be assessed by overnight Polysomnography (PSG; using the recording system Embla N7000/M-Drive) which includes video monitoring for scoring purposes (consent form attached in appendix). This includes the registration of several physiological measures:

Brain wave activity: measured by Electroencephalography (EEG); Electrodes placed over the scalp record electrical activity produced by neuronal firing and allow the differentiation of the different sleep stages according to standard criteria [American Academy of Sleep Medicine, AASM; 8]. Moreover, parameters concerning sleep continuity (e.g. sleep duration, sleep efficiency and sleep latency) can be derived. The electrodes are placed according to the 10-20 system (F3, F4, C3, C4, O1, O2, M1, M2, (Fpz=ground)).

Eye movements: measured by Electrooculography (EOG); Two electrodes are placed at the outer canthi of the eyes. The right one is placed about 1 cm below and the left one 1 cm above the horizontal line. The registration of eye movements is necessary for adequate sleep scoring.

Muscle tone: Electromyography (EMG). Two electrodes on the chin muscle measure the muscle tone. The muscle tone is another important parameter for sleep scoring.



Heart frequency: For the Electrocardiogram (ECG) one electrode is placed approximately two finger widths below the right clavicle. The other one is placed on the left lower ribcage. The Electrocardiogram allows the detection of any irregularities in the heart rate pattern in the course of the night.

Limb movements: Two electrodes on each leg measure the activity of the anterior tibialis muscles. This measure allows the detection of periodic limb movements (PLM) during sleep, expressed by the PLMS-Index. Furthermore, two electrodes on each arm measure muscle activity and movements.

Nasal airflow: A nasal pressure cannula is used to measure nasal airflow, allowing the identification of apneas or hypopneas, as well as snoring.

Blood oxygen saturation: pulse oximetry measures the oxygen saturation of the arterial blood by spectrophotoelectrical principles. A two-wavelength light transmitter and receiver are placed on either side of a fingertip. The amplitude of light detected by the receiver allows the determination of the oxygen saturation. The decreases in oxygen saturation over the course of the night are expressed by the Oxygen-Desaturation-Index.

Abdominal and thoracic breathing pattern: The respiratory effort is measured by bands embedded with wire. One is placed around the thorax and the other one around the abdomen.

Snoring: A piezo-sensor is placed at the side of the anterior neck above the larynx in order to measure vibrations resulting from snoring.

Furthermore video and audio recordings are obtained in order to allow adequate sleep scoring. The questionnaire applied in clinical routine will be filled out in the evening before the PSG, respectively in the morning after getting up for assessment of subjective sleep quality on that night (see Appendix). Examination times will be standardized (sleep time of 7 hours).

**Activities of daily living:** activities of daily living in ON & OFF state are assessed with the UPDRS II (see Appendix).

**Quality of life:** The Parkinson's Disease Questionnaire (PDQ-39) in German will be used to assess quality of life in PD patients (see Appendix).

**Mood:** The Hospital Anxiety and Depression Scale (HADS) questionnaire in German will be used to exclude depression as underlying cofactor for sleep disturbances. It will be assessed as self-reported questionnaire by the patient (see Appendix).

**Cognition:** The Montreal Cognitive Assessment (MoCA) in German will be used to quantify cognitive function by a fast and established questionnaire which is recommended by the Parkinson Study Group for use in clinical trials (see Appendix).

**Impulse control:** Impulse control and potential impulsive-compulsive disorders will be assessed by the Questionnaire for Impulsive-Compulsive Disorders in Parkinson's Disease-Rating Scale (QUIP-RS) in German (see appendix).

**Vigilance:** Vigilance will be assessed by two self-reported questionnaires by the patients, the Epworth Sleepiness Scale (ESS) and the Fatigue Severity Scale (FSS; see appendix). During the MSLT, we will perform the Sustained Attention to Response Test (SART) and the Psychomotor Vigilance Test (PVT) after the first and the third nap. The SART is a very sensitive measure of vigilance in which subjects respond only to the appearance of specific numbers on a black computer screen by pressing a small button [9]. Subjects press the button before the next number appears and are instructed that accuracy is more important than speed. A complete test takes 4 minutes and 20 seconds to perform. The SART error score consists of the total number of errors. The PVT measures reaction times of subjects to the sudden appearance of a timekeeper on a screen [10]. The test lasts 10 minutes and assesses the number of lapses (times the subject fails to respond to the signal in time), and calculates median reaction times. Both tests require continuous attention and measure vigilance of tested subjects.

**Subjective Daytime Sleepiness:** In addition to the objective EDS measured by the MSLT, subjective sleepiness will be assessed prior to each nap in the course of the MSLT by the Karolinska Sleepiness Scale and the Stanford Sleepiness Scale (see Appendix).

**Sleep wake rhythm:** Sleep and physical activity levels will be recorded over 14 days by wrist actigraphy (on the non-dominant wrist; light sensor data included, Actiwatch, Respiromics) [11]. We will assess the amount of activity, the amount of rest and estimate the number of naps. The recording is starting 14 days before each start of drug administration and 14 days before the end of the respective administration.

**Quality of life of partners and caregivers:** Quality of life of partners or caregivers will be assessed by the Zarit Burden of caregiver Interview (ZBCI), which is validated in its German version [12] and for Parkinson patients [13] (see Appendix). Additional questions regarding the patients sleep behaviour are added at the end.

#### Secondary Safety Variable(s)

During drug intake, visits with a clinical assessment (incl. vigilance by the ESS) examination of vital signs and registration of adverse events are taking place every second week. In between these visits, medication adherence and possible adverse events are monitored by phone calls with the patients. Blood counts (incl. liver enzymes) are assessed before and at the end of each period of drug administration. Blood samples will be taken by the investigator, and will be processed by the laboratory of the University Hospital Zurich.

|                                         |         |
|-----------------------------------------|---------|
| Blood Assessment:                       | norm:   |
| Alanine Aminotransferase (ALT; GPT) U/l | 10 - 35 |
| Gamma-glutamyl Transferase (GGT) U/l    | 5 - 36  |

|                                               |             |
|-----------------------------------------------|-------------|
| Alkaline Phosphatase (AP) U/l                 | 35 - 104    |
| Blood urea mmol/l                             | 2.14 - 7.14 |
| Kreatinin µmol/l                              | 44 - 80     |
| Natrium mmol/l                                | 136 - 145   |
| Kalium mmol/l                                 | 3.3 - 4.5   |
| Calcium, total mmol/l                         | 2.09 - 2.54 |
| Calcium Albumin corrected mmol/l              | 2.09 - 2.54 |
| Albumin g/l                                   | 40 - 49     |
| C-Reactive Protein (CRP) mg/l                 | < 54        |
| Thyroid-stimulating Hormone (TSH), basal mU/l | 0.16 - 4.25 |
| 25-Hydroxy-Vitamin D µg/l                     | > 20        |

## 6 STUDY DESIGN AND COURSE OF STUDY

### 6.1 General Design

This phase II trial, has a prospective double-blind randomized placebo-controlled crossover design, and is conducted in 16 PD patients.

The schematic study design is visible in figure 1. Each patient receives 6 weeks of sodium oxybate (dose: 3g – 9g per night in a split dose regime) and 6 weeks of placebo treatment in a crossover randomised order. The washout phase can be individually adjusted to patient needs between 2 – 4 weeks – in view of the short half-life of sodium oxybate of 0,5 – 1h this is still enough in order to avoid carry over effects and adjusts for individual patient needs due to the long protocol duration.

Visit 1 takes place after 14 days of actigraphy right after the screening visit. This results in a total of 16-18 weeks of participation for every patient.

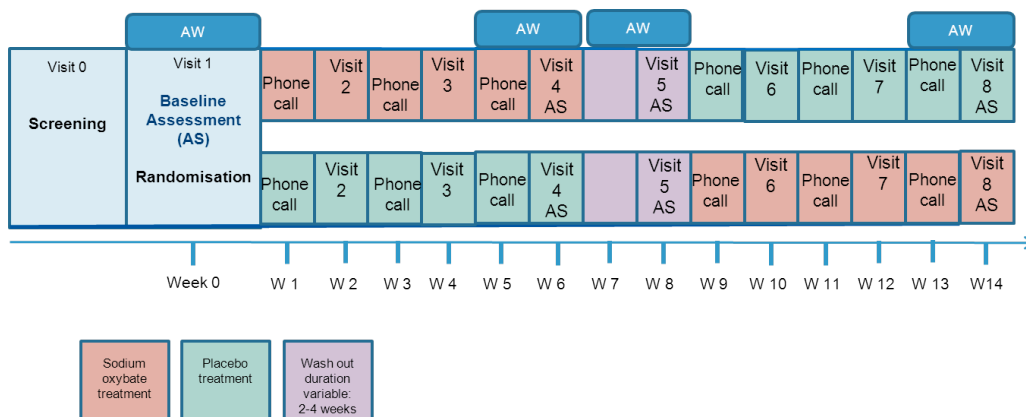

**Figure 1: Study Design.** The examinations from visit 1 are repeated in visit 4, 5 and 8, indicated by AS. Randomisation is taking place after Baseline Assessment. AW indicates 2-week actigraphy.

### 6.2 Visit 0 (Screening): during normal routine visits

- Inclusion after written consent.
- Documentation of demographic data.
- Assessment of full patient's history incl. ESS.
- Pregnancy test if required.
- Start Actigraphy for 2 weeks (handed out at the sleep laboratory)

### 6.3 Visit 1 (Randomization and baseline; day 0)

At the sleep laboratory (duration is about 21.5 hours; 7.30pm – 5pm):

- Assessment of nocturnal sleep, activities of daily living, quality of life, mood & cognition (PDSS-2, RBDSQ, UPDRS part II, PDQ-39, HADS, MoCA, QUIP-RS).
- Assessment of vigilance (ESS, FSS).
- Assessment of quality of life of partners or caregivers (ZBCI) - Can also be filled out at home if they are not present -
- Clinical assessment + vital signs (pulse, blood pressure, breathing rate, peripheral oxygen saturation, body temperature), blood tests.
- nocturnal PSG: as indicated above.
- Next morning: UPDRS part III before (OFF) & after (ON) morning levodopa dose.
- MSLT: assessment of objective daytime sleepiness
- Return actigraphy
- Checking of all inclusion and exclusion criteria.
- Randomization to one of the two groups:  
6 weeks treatment with sodium oxybate, followed by 6 weeks with placebo  
vs.  
6 weeks treatment with placebo, followed by 6 weeks with sodium oxybate.
- Hand out of and instruction for “Medikationstagebuch”. The study medication and written “patients instructions” (see appendix) are handed out by the investigator. The patient and if possible his relative/caregiver are instructed how to apply the study medication.
- Treatment with PD drugs remains unchanged as far as the clinical situation allows.
- The patient starts to take the study medication from the night after Visit 1 onwards (3g per night in a split dose regime).
- All visits are done on the same time of the day to yield comparable results for clinical scores. The dates for the visits and the phone calls are scheduled at the baseline visit and noted in the written “visits schedule” (see appendix).

#### 6.4 First drug (cross-over design)

- Day 7: Phone call: review of medication adherence and documentation of any possible adverse events. According to the patient’s history the dose may be increased to 4.5g per night and recorded in the “Medikationstagebuch”.
- Day 14 (Visit 2, duration: about 30min at the clinic for neurology): Collection of unused investigational drug and empty packages, review of medication adherence, review of concomitant medication, clinical assessment, ESS, vital signs, documentation of adverse events. According to the patient’s history and to clinical judgement, the dose may be in- or decreased by 1.5g per night and recorded in the “Medikationstagebuch”. The new study medication is handed out by the investigator.

- Day 21: Phone call: review of medication adherence and documentation of any possible adverse events. According to the patient's history the dose may be in- or decreased by 1.5g per night and recorded in the "Medikationstagebuch".
- Day 28 (Visit 3, duration: about 30min at the clinic for neurology): Collection of unused investigational drug and empty packages, review of medication adherence, review of concomitant medication, clinical assessment, ESS, vital signs, documentation of adverse events. According to the patient's history and to clinical judgement, the dose may be in- or decreased by 1.5g per night and recorded in the "Medikationstagebuch". The new study medication is handed out by the investigator. Start of actigraphy.
- Day 35: Phone call: review of medication adherence and documentation of any possible adverse events. According to the patient's history and to clinical judgement, the dose may be in- or decreased by 1.5g per night and recorded in the "Medikationstagebuch". The dose must not be increased if the maximal dose of 9g per night is already applied.
- Day 42 (Visit 4, duration: about 21.5 hours in the sleep laboratory): Same examinations as at visit 1 on the last day of drug 1 use – stop drug 1. Review of medication adherence, review of concomitant medication, documentation of adverse events. Collection of unused investigational drug and empty packages. Start of actigraphy 2 weeks prior to second baseline visit – handed out at visit 4 or sent by mail 2 weeks before second baseline visit.

#### 6.5 Wash-out period

- No placebo or compound will be administered for 2 – 4 weeks to sufficiently prevent carry-over events.

#### 6.6 Second baseline day 49 (Visit 5)

- Same examinations as at visit 1. The new study medication is handed out by the investigator.
- Start drug 2 (3g per night in a split dose regime).

#### 6.7 Second drug (cross-over design)

- Telephone and physical visits at days 56 – 91 (in weekly changing rhythm as during first study arm)
- Day 91 (Visit 8, duration: about 21.5 hours in the sleep laboratory) Same examinations as at visit 1 on the last day of drug 2 use – stop drug 2. Review of medication adherence, review of concomitant medication, documentation of adverse events. Collection of unused investigational drug and empty packages. Repetition of pregnancy test, if one was performed at visit 0.

To avoid side effects and optimize tolerability the dosage of the study medication can be adjusted for 1 of the 2 time points of drug intake separately and also in steps of less than 1.5g (total dose per night).

## 7 SUBJECT SELECTION AND WITHDRAWAL

The enrolment goal is 8 patients per year.

### 7.1 Inclusion Criteria

Patients fulfilling all of the following inclusion criteria may be enrolled in the study:

- Moderate to severe Parkinson's disease (Hoehn and Yahr II/III) diagnosis according to international criteria [14],
- History of disturbed nocturnal sleep and presence of EDS (ESS >10 points),
- Doses of dopaminergic and other PD treatment must have been stable for at least 14 days prior to the screening visit,
- Negative pregnancy test prior to inclusion (except in women who are surgically sterilized/hysterectomized or post-menopausal for longer than 2 years),
- Patients are capable of giving informed consent,
- Signed Informed Consent after being informed.

The Hoehn&Yahr scale differs between the following degrees of disease progression:

- Stage 0: No signs of disease.
- Stage 1: Unilateral symptoms only.
- Stage 2: Bilateral symptoms. No impairment of balance.
- Stage 3: Balance impairment. Mild to moderate disease.
- Stage 4: Severe disability, but still able to walk or stand unassisted.
- Stage 5: Needing a wheelchair or bedridden unless assisted.

### 7.2 Exclusion Criteria

The presence of any one of the following exclusion criteria will lead to exclusion of the subject:

- Atypical Parkinson disorder, Parkinson's disease without response to levodopa,
- AHI >15 or oxygen saturation consistently below 90% on baseline polysomnography
- diagnosis of sleep apnoe-syndrome or COPD
- Severe dementia (MoCA<22),
- Moderate to severe depression (HADS questions regarding depression [questions 2, 4, 6, 8, 10, 12, 14] in sum > 11).

- Contraindications to the class of drugs under study, e.g. known hypersensitivity or allergy to class of drugs or the investigational product,
- Regular use of CNS depressant substances (opioids, barbiturates) as well as melatonin and other sleep-inducing substances,
- Other clinically significant concomitant disease states (e.g., renal insufficiency (Kreatinin > 120 resp. GFR <40ml/min), hepatic dysfunction (GPT > 100U/l), severe cardiovascular disease, etc),
- Known or suspected non-compliance, substance or alcohol abuse (i.e. > 0.5 l wine or 1 l beer per day),
- Homeless persons,
- Women who are pregnant or breast feeding,
- Intention to become pregnant during the course of the study,
- Lack of safe contraception, defined as:

Female patients of childbearing potential, not using and not willing to continue using a medically reliable method of contraception for the entire study duration, such as oral, injectable, or implantable contraceptives, or intrauterine contraceptive devices, or who are not using any other method considered sufficiently reliable by the investigator in individual cases.

Please note that female patients who are surgically sterilized/hysterectomized or post-menopausal for longer than 2 years are not considered as being of child bearing potential.

- Inability to follow the procedures of the study, e.g. due to language problems, psychological disorders, etc. of the patient,
- Participation in another study with investigational drug within the 30 days preceding and during the present study,
- Previous enrolment into the current study,
- Enrolment of the investigator, his/her family members, employees and other dependent persons,

### 7.3 Subject Recruitment and Screening

In total, 16 subjects will be enrolled. The patients will be recruited by the outpatient clinic of the movement disorder clinic of the clinic for neurology of the University Hospital Zurich. During normal routine visits they will be informed about the study details by a member of the study team and handed out a written description of the study with further information (see "Patienteninformation"), if interested. Besides that, an advertisement in the journal *Parkinson Schweiz* will be published (for text see Appendix). Patients can contact the study team if interested and will be provided with further study details orally and in written form.

There will be no payment for study participation. However, reasonable deduction of expenses related to the study protocol is possible (e.g. travel expenses).



## **7.4 Early Withdrawal of Subjects**

Withdrawn subjects will be replaced by another subject who will receive same therapy regimen.

Usually, subject compliance in PD patients is not problematic.

The acceptable time windows for visits, test schedules and phone calls are  $\pm 5$  days.

In case of occurring adverse events, patients are instructed to call the investigator, who will interpret the situation as to whether the adverse event could be related to the study treatment. Action will be taken accordingly.

The partner or caregiver of the patient will be asked to fill out the ZBCI before and after each study arm. However, if no participation of the partner or caregiver is wanted or possible, patients are not withdrawn.

### **7.4.1 Criteria for Early Withdrawal of Subjects**

Early withdrawal of subjects will be done if one or more of following scenarios will emerge:

- safety reasons, i.e. severe adverse events,
- failure of patient to adhere to protocol,
- missing of more than one appointment will lead to withdrawal,
- non-compliance of medication intake,
- subject consent withdrawal,
- disease progression necessitating other treatment strategies,
- Pregnancy.

### **7.4.2 Data Collection and Follow-up for Withdrawn Subjects**

Follow-up after withdrawal will be performed during regular visits of the patients in the movement disorder unit of our hospital. If needed, patients will receive earlier appointments. If a patient misses an appointment, a telephone call will be performed and a new appointment will be arranged promptly. Data of withdrawn subjects will be stored and handled in the same manner as the data of regular assigned subjects.

## **7.5 Early Termination of Study**

The Sponsor-Investigator may terminate the study prematurely according to certain circumstances:

- ethical concerns,
- insufficient patient recruitment,
- when the safety or benefit of the patients is doubtful or at risk, respectively,
- alterations in accepted clinical practice that make the continuation of a clinical trial unwise,
- reaching a positive or negative statistical end point earlier than anticipated.

## 8 TREATMENTS

### 8.1 Treatments to be Administered

Treatment A: Sodium oxybate treatment

Treatment B: placebo treatment

### 8.2 Identity of Investigational Product(s)

Treatment A: Sodium oxybate treatment

- Brand name: Xyrem, Source: UCB Pharma AG
- Zulassungsnummer: 57184 (Swissmedic).
- Zulassungsinhaberin: UCB-Pharma AG, Bulle.
  
- Pharmaceutical form: oral solution
- Active ingredients: 500mg Natrii oxybas/ml
- Inactive ingredients: water purified, DL malic acid

Treatment B: placebo

- placebo will be provided by UCB Pharma AG in identical form as verum
- Inactive ingredients: Sodium citrate dihydrate, water purified, DL malic acid

Bottles containing 180ml of Xyrem (500mg Natrii oxybas/ml) and bottles containing 180ml of Placebo, will be provided by UCB Pharma AG and will directly be shipped to the KAZ for blinding and randomization. The blinded, labelled study medication will be shipped to the investigational site.

Treatment A or B will be administered every day at night time for 6 weeks each.

Both treatments are administered orally by the patient itself. If necessary, the investigator will make sure that a relative or caregiver is able to assist in daily treatment administration. The patient receives a bottle with 180ml of the respective solution, a measuring device and two dosing cups. According to the daily dose noted in the "Medikationstagebuch", the patient or his caregiver prepares both cups with the spilt dose according to the "patient`s instructions" before bedtime. The dosage starts at 3g per night and is adapted in steps of 1.5g during visits and telephone screenings and always noted in the "Medikationstagebuch". The maximal dosage is 9g per night.

To avoid side effects and optimize tolerability the dosage of the study medication can be adjusted for 1 of the 2 time points of drug intake separately and also in steps of less than 1.5g (total dose per night).

### **8.3 Method of Assigning Subjects to Treatment Groups**

The patient's identity will be anonymized using a consecutive study patient number upon inclusion. After checking in/exclusion criteria, incl. the AHI, each eligible patient will be assigned an additional consecutive study randomization letter "A" – "P" (for 16 patients) and can continue with the study – the final treatment group assignment is based on this randomization letter, accounting for the fact that initially included patients might not be eligible for participation because of not meeting all inclusion criteria assessed at the baseline assessment (e.g. the AHI, which can only be calculated after the PSG). For each patient the study medication will be provided by the investigator – the order of active and placebo treatment is assigned randomly to randomization letters by the KAZ. Documentation of content of each set will be named on a sealed randomisation list. Access to the list will be controlled and documented.

### **8.4 Treatment Compliance**

For monitoring of the treatment compliance, the patients will be handed out the medication for two weeks on every visit. On each visit, patients have to bring unused medication back and will be asked about treatment compliance. Additionally, patients will also be asked about treatment compliance on regular phone calls: the "Medikationstagebuch" will be updated on each contact and patients are asked to keep it as a medication diary (see appendix), i.e. to document the time and amount of medication intake. Non-compliance is defined by declaration of two or more missed intakes per week. Non-compliance for more than two times will lead to study withdrawal. Data of non-complaint subjects will be handled like data of complaint subjects.

### **8.5 Prior and Concomitant Therapy**

Treatment with PD drugs remains unchanged during the study, unless it is warranted by the clinical state of the patient. CNS-depressant substances (opioids, barbiturates), as well as melatonin and other sleep-inducing substances are not allowed during the course of the study. The use of such medication on more than 2 occasions during the study will lead to withdrawal of subjects. Regular prior use of such medication will lead to exclusion of subjects. All concomitant and/or rescue treatment(s) have to be recorded in the electronic Case Report Form (eCRF).

### **8.6 Packaging, Labelling and Supply**

Verum and placebo will be provided by UCB Pharma AG in identical bottles. The medication and material will be shipped directly to the KAZ, where the labelling is taking place. An example of the label used is provided in the Appendix. The labelled study medication (sodium oxybate and placebo) is then shipped to the investigational site. Upon receipt of the study treatment supplies, an inventory must be performed and a drug receipt log filled out and signed by the person accepting the shipment. It is important that the designated study staff counts and verifies that the shipment contains all the items noted in the shipment inventory. Any damaged or unusable study drug in a given shipment (active drug or comparator) will be documented in the study files.

The study medication will be dispensed to the patients according to the randomization letter and the respective treatment period (drug 1 and drug 2) after every visit during

medication intake. The dispensed and the returned amount of study medication will be documented for each patient. Unfinished bottles will be returned to the patient after documentation of the amount remaining. The amount dispensed in total at every visit must correspond at least to the amount needed up to the next visit. It must be considered, that the dose might be increased after one week (at phone calls).

Regular study drug reconciliation will be performed to document “drug assigned”, “drug consumed”, and “drug remaining”. This reconciliation will be logged on the drug accountability form, and signed and dated by the study team.

### **8.7 Blinding**

The blinding will be done by the KAZ. The study medication sets for each patient (according to the randomization number) will be labelled with drug 1 and drug 2, referring to treatment period 1 and 2. One of these study set will contain the placebo only.

An Emergency Code Break will be available to the investigator. This Code Break should be opened only in emergency situations when the identity of the investigational product must be known by the investigator in order to provide appropriate medical treatment. Blinding will also be broken in case of occurring SUSARs. The Emergency Code Break is provided in terms of individual envelopes for every randomization letter.

### **8.8 Storage Conditions**

The investigational product must be kept at room temperature (15-25°C) and out of the reach of children.

### **8.9 Study Drug Accountability**

Investigational product supplies must be kept in a secure, limited access storage area under the recommended storage conditions. A temperature logging must be provided. The investigator must maintain accurate and adequate records including dates, lot number, quantities received, individual usage, etc.

### **8.10 Return or Destruction of Study Drug**

At the completion of the study, there will be a final reconciliation of drug shipped, drug consumed, and drug remaining. This reconciliation will be logged on the drug accountability form, signed and dated. Any discrepancies noted will be investigated, resolved, and documented prior to return or destruction of unused study drug. Drug destroyed on site will be documented in the study files.

## **9 STUDY PROCEDURES**

## **9.1 Screening**

Screening will be performed during routine or arranged visits at the outpatient clinic of the movement disorder clinic of the clinic for neurology. In case of given written informed consent after providing detailed information about the study, the patient's medical history, demographics, concomitant therapy regimen and the ESS is assessed by the investigator. If needed, a pregnancy test is performed subsequently. If present, the investigator will ask the partner or the caregiver of the patient, if he/she is willing to fill out the ZBCI before and after each study arm. A sleep questionnaire regarding different factors of sleep is handed out to the patient. The patient is asked to fill out the questionnaire at home and to return it on visit 1.

The patient is asked to pick up the Actiwatch at the sleep laboratory of the clinic for neurology right after the screening visit. There the patient is instructed by the regular sleep laboratory assistants. The instructions take about 20 minutes.

## **9.2 Assessment visits**

The assessment will usually be scheduled to start at about 7.30pm at the sleep laboratory (visits 1, 4, 5, 8). The first baseline visit takes place at least 2 weeks after the screening visit. Patients are asked to arrive after dinner.

The patients will fill out the questionnaires (PDSS-2, PDQ-39, RBDSQ, HADS, MoCA, QUIP-RS, FSS, ESS) in the presence of the investigator. The investigator will assess the UPDRS II and the clinical assessment including vital signs by standard means (pulse, blood pressure, breathing rate, peripheral oxygen saturation, body temperature). Concomitant medication will be reviewed and possible adverse events and adherence to study medication will be assessed at visits 4 and 8. The investigator takes back any unused study medication and the medication diary (at visits 4 and 8; after preparing the dosage for the last study medication intake) or hands out and gives instructions for the medication diary to the patient (visit 5).

Blood samples will then be taken by the investigator in order to assess different blood parameters including liver enzymes. Blood samples will be destroyed right after analyses and are therefore not stored for other research purposes.

At visit 8 the pregnancy test will be repeated in those patients who have undergone testing at the screening visit.

The patient relative/carer can fill in the ZBCI at the study site or at home - in the latter it will be returned by mail.

At about 9pm the patient is prepared for the PSG, as it is done in clinical routine (takes about 1 - 1.5 hours). This includes a questionnaire (see PSG-questionnaire in the Appendix). The PSG is performed by the regular sleep laboratory assistants. The patients are allowed to go to sleep between 10pm and midnight and are woken up between 6am and 7am. Time in bed is fixed to 7 hours. After waking up, the OFF-part of the Levodopa-Test is performed by a study clinician. 60min after the intake of the morning dose of L-dopa the ON-part of the Levodopa-Test is performed by the same clinician and the patient will have breakfast. The MSLT starts between 8.30am and 9.30am, lasts about 6.5 hours and is also performed by the regular sleep laboratory assistants. For the detailed schedule of the MSLT refer to section 5.1. In between the naps during the MSLT, the actigraphy data collection will be stopped and analyzed.

After completion of the MSLT the patients are allowed to take a shower and to leave. At visit 1, the investigator will check all inclusion and exclusion criteria prior to

randomization, handing out of the study medication and the “Medikationstagebuch” (both handed out at visit 1 and visit 6).

The total duration of the assessments at the sleep laboratory is about 21.5 hours (7.30pm – 5pm the next day).

### **9.3 Visits during the course of study medication intake**

The visits during the course of study medication intake will take place at the clinic for neurology and last about 30 minutes. The investigator will perform a standard clinical assessment including vital signs by standard means (pulse, blood pressure, breathing rate, peripheral oxygen saturation, body temperature), and will assess the ESS, concomitant medication, study medication adherence and possible adverse events. The investigator also might change the study medication dosage at visits 2, 3, 6 and 7. The changes in study medication will be noted in the medication diary of the patient as well as in the study documents (i.e. eCRF). The investigator will also take back any unused study medication. The investigator hands out the study medication and the “Medikationstagebuch” for the next 2 weeks.

### **9.4 SAFETY**

During drug intake, physical visits and phone calls are scheduled according to the protocol (see previous sections) to record vigilance, adverse events, medication adherence and possible adverse events. For all safety measures no special precautions concerning time of day, relation to meals or relation to intake of investigational product have to be done.

### **9.5 Definition of (Serious) Adverse Events**

#### **Adverse events**

Adverse events (AEs) are defined as any untoward medical occurrence in a patient or clinical investigation subject administered a pharmaceutical product and which does not necessarily have a causal relationship with this treatment. An AE can therefore be any unfavourable and unintended sign (including an abnormal laboratory finding), symptom, or disease temporally associated with the use of a medicinal study product, whether or not related to the medicinal study product. An AE may also consist of a new disease, an exacerbation of a pre-existing illness or condition, a recurrence of an intermittent illness or condition, a set of related signs or symptoms, or a single sign or symptom.

AEs observed by the investigator and/or reported by the subject must be reported in the eCRF during the entire study period, i.e. the period of time from the first (= signature of informed consent) to the last protocol-specific procedure regardless of the medicinal study product relation assessment.

For all AEs, sufficient information will be pursued and/or obtained so as to permit an adequate determination of the outcome of the event (i.e., whether the event should be classified as an Serious Adverse Event, SAE) and an assessment of the casual relationship between the AE and the investigational drug or study treatment(s).

Whenever available, the underlying disease or condition for which a therapeutic or diagnostic procedure is required should be reported as the AE term. Surgeries or other invasive procedures that had already been planned prior to the start of the study do not have to be documented as AEs. These planned procedures will be recorded in the eCRF by the investigator at the baseline visit. It is not important if the condition was known before enrolment, only if the procedure was planned before.

Pregnancy per se does not classify as an AE. However, AEs related to a pregnancy have to be reported like any other AEs. Pregnancy should be confirmed by a reliable laboratory test. Pregnant subjects must be immediately withdrawn from the clinical study. All pregnancies occurring during the treatment phase of the study have to be reported to the Investigator-Sponsor within one working day of the investigational sites knowledge of the pregnancy on the Initial Pregnancy Report Form – women partaking in the study are informed in the “Patient information” to report pregnancies detected later to the study team. The Sponsor-Investigator will contact the attendant physician by phone during pregnancy and after the estimated date of delivery to enquire about course and outcome of the pregnancy. Course of the pregnancy and health status of the new born child have to be documented on the Follow-Up Pregnancy Report Form.

### **Serious adverse event**

An SAE is any untoward medical occurrence that at any dose results in

- results in death,
- is life-threatening,
- requires subject hospitalization or prolongation of current hospitalization,
- results in persistent or significant disability/incapacity, or
- is a congenital anomaly/birth defect,
- any important medical event and any event which, though not included in the above, may jeopardise the subject or may require intervention to prevent one of the outcomes listed above.

Any other medically important condition that may be not immediately life-threatening or results in death or hospitalization but may jeopardize the subject or may require intervention to prevent one of the outcomes listed above should also usually (i.e. based on medical and scientific judgment) be considered serious. For example: intensive treatment at home for allergic bronchospasm; certain laboratory abnormalities (e.g. blood dyscrasias); convulsions that do not result in hospitalisation; development of drug dependency or drug abuse.

### **Suspected unexpected serious adverse reaction (SUSAR)**

A serious adverse reaction, the nature or severity of which is suspected to be not consistent with the applicable product information (i.e. package insert/summary of product characteristics).

## 9.6 Recording of (Serious) Adverse Events

Clinical study subjects will be routinely questioned about AEs at study visits. The well-being of the subjects will be ascertained by neutral questioning ("How are you?"). The investigator is responsible for reporting all AEs occurring during the course of the study.

All observed or volunteered adverse drug events (serious or non-serious) and abnormal test findings, regardless of treatment group or suspected causal relationship to the investigational drug or study treatment(s) will be recorded in the patient file and subsequently in the eCRF.

AEs or abnormal test findings felt to be associated with the study treatment(s) will be followed until the event (or its sequelae) or the abnormal test finding resolves or stabilizes at a level acceptable to the investigator.

An abnormal test finding will be classified as an AE if one or more of the following criteria are met:

- The test finding is accompanied by clinical symptoms.
- The test finding necessitates additional diagnostic evaluation(s) or medical/surgical intervention; including significant additional concomitant drug treatment or other therapy  
**Note:** simply repeating a test finding, in the absence of any of the other listed criteria, does not constitute an AE.
- The test finding leads to a change in study dosing or discontinuation of subject participation in the clinical study.

All AEs, serious and non-serious, will be fully documented in the appropriate eCRF. For each AE, the investigator will provide the onset, duration, intensity, treatment required, outcome and action taken with the investigational product.

The intensity of AEs will be assessed as being

- mild (hardly noticeable, negligible impairment of well-being),
- moderate (marked discomfort, but tolerable without immediate relief), or
- severe (overwhelming discomfort, calling for immediate relief).

The investigator will determine the relationship of the investigational drug to all AEs as defined on the AE page of the eCRF.

## 9.7 Assessment of (Serious) Adverse Events

The investigator will promptly review documented AEs and abnormal test findings to determine if

- the abnormal test finding should be classified as an AE,
- if there is a reasonable possibility that the AE was caused by the investigational drug or study treatment(s), and
- if the AE meets the criteria for an SAE.



The assessment by the investigator with regard to the study drug relation is done according to the following definitions:

#### Unrelated

- no temporal relationship to drug administration
- other drugs or chemicals or underlying disease provides definite explanations

#### Unlikely

An AE, whose

- temporal relationship to drug administration makes a causal relationship improbable
- other drugs or chemicals or underlying disease provides plausible explanations

#### Possibly

An AE, which

- occurs within a reasonable time sequence to administration of the drug
- but could also be explained by concurrent disease or other drugs or chemicals

#### Probably

An AE, which

- occurs within a reasonable time sequence to administration of the drug
- is unlikely to be attributed to concurrent disease or other drugs or chemicals

#### Definitely

An AE, which

- plausible time relationship to IMP administration
- cannot be explained by concurrent disease or other drugs or chemicals

### **9.8 Reporting of Serious Adverse Events**

The Investigator is responsible for SAE reporting to the IEC according to the following details:

- Reporting to IEC any SAE which resulted in death:
  - **without delay**, and no later than **7 calendar days**.
- Reporting to IEC of fatal and life-threatening SAEs if evaluated as “drug related” (SADR):

- **without delay** and no later than **7 calendar days** following awareness that event meets criteria for an SADR.
- Reporting to IEC of fatal and life-threatening SAEs if evaluated as “suspected”, “unexpected” and “drug related” (SUSAR)
  - **without delay** and no later than **7 calendar days** following awareness that event meets criteria for an SUSAR.
  - follow-up information regarding the SUSAR within **further 8 calendar days**.
- Reporting to IEC of non-fatal and not life-threatening SAEs if evaluated as “suspected”, “unexpected” and “drug related” (SUSAR):
  - **promptly** and no later than **15 calendar days** following awareness that event meets criteria for a SUSAR.
- All other SAEs will be summed up in the **annual safety update report**.

The Sponsor is responsible for SAE reporting to Swissmedic according to the following details:

- Compliance with the regulatory requirements of Swissmedic regarding prompt reporting of unexpected SAEs for which a causal relationship with the study drug or device cannot be ruled out.
- Reporting to Swissmedic of fatal and life-threatening SAEs if evaluated as “suspected”, “unexpected” and “drug related” (SUSAR):
  - **without delay** and no later than **7 calendar days** following awareness that event meets criteria for a SUSAR;
  - follow-up information regarding the SUSAR within **further 8 calendar days**.
- Reporting to Swissmedic of non-fatal and not life-threatening SAEs if evaluated as “suspected”, “unexpected” and “drug related” (SUSARs):
  - **promptly** and no later than **15 calendar days** following awareness that event meets criteria for a SUSAR.
- Sending yearly safety reports, starting one year after the date of notification to Swissmedic. These reports should contain:
  - A concise critical summary of the safety profile of the drug studied as well as the safety issues that have arisen;
  - A listing of all SUSARs that have occurred in Switzerland and at international level (if applicable);
  - Ideally all adverse drug reactions at international level.
  - The accompanying letter provided with the Annual Safety Report should contain a short summary of the status of the clinical trial in Switzerland (number of centres open/closed, number of patients recruited/recruitment closed, and number of SAR/SUSAR).

An unexpected SAE refers to any AE, the nature or severity of which is not consistent with the applicable product information (see *Arzneimittel-Kompendium der Schweiz* 2012).

## **9.9 Follow up of (Serious) Adverse Events**

Subjects terminating the study (either regularly or prematurely) with

- reported ongoing SAE, or
- any ongoing AEs of laboratory values or of vital signs being beyond the alert limit

will return for a follow-up investigation. This visit will take place up to 30 days after terminating the treatment period. Follow-up information on the outcome will be recorded on the respective AE page in the eCRF. All other information has to be documented in the source documents. Source data has to be available upon request.

In case of subjects lost to follow-up, efforts should be made and documented to contact the subject to encourage him/her to continue study participation as scheduled. In case of minor AEs a telephone call to the subject may be acceptable.

All new SAE or pregnancies that the investigators will be notified of within 30 days after discontinuation of study medication have to be reported in appropriate report forms and in the eCRF if required.

Follow-up investigations may also be necessary according to the investigator's medical judgment even if the subject has no AE at the end of the study. However, information related to these investigations does not have to be documented in the eCRF but must be noted in the source documents.

## **10 DATA QUALITY ASSURANCE**

The Sponsor-Investigator is implementing and maintaining quality assurance and quality control systems with written Standard Operating Procedures (SOPs) and Working Instructions to ensure that trials are conducted and data are generated, documented (record), and reported in compliance with the protocol, GCP, and applicable regulatory requirement(s).

Monitoring and Audits will be conducted during the course of the study for quality assurance purposes.

### **10.1 Routine Monitoring**

Regular monitoring visits at the investigator's site prior to the start and during the course of the study will help to follow up the progress of the clinical study, to assure utmost accuracy of the data and to detect possible errors at an early time point. The Sponsor-Investigator organises professional independent monitoring for the study.

All original data including all patient files, progress notes and copies of laboratory and medical test results must be available for monitoring. The monitor will review all or a part of the eCRFs and written informed consents. The accuracy of the data will be verified by reviewing the above referenced documents. The investigator's site will

collaborate with the Clinical Trials Center (CTC) of the University Hospital Zurich to ensure regular monitoring. According to the CTC's Monitoring SOP the extent and nature of monitoring activities based on the objective and design of the study will be defined in a study specific Monitoring Plan.

## **10.2 Audits and Inspections**

A quality assurance audit/inspection of this study may be conducted by the regulatory authority or IEC, respectively. The quality assurance auditor/inspector will have access to all medical records, the investigator's study related files and correspondence, and the informed consent documentation that is relevant to this clinical study.

The investigator will allow the persons being responsible for the audit or the inspection to have access to the source data/documents and to answer any questions arising. All involved parties will keep the patient data strictly confidential.

## **10.3 Specification of Source Documents**

The following documents are considered source data, including but not limited to:

- SAE worksheets
- Nurse records, records of clinical coordinators, and
- Medical records from other department(s), or other hospital(s), or discharge letters and correspondence with other departments/hospitals, if subject visited any during the study period and the post study period.

Source data must be available at the site to document the existence of the study subjects and substantiate the integrity of study data collected. Source data must include the original documents relating to the study, as well as the medical treatment and medical history of the subject.

The following information (at least but not limited to) should be included in the source documents:

- Demographic data (age, sex)
- Inclusion and Exclusion Criteria details
- Participation in study and signed and dated Informed Consent Forms
- Visit dates
- Medical history and physical examination details
- Key efficacy and safety data (as specified in the protocol)
- AEs and concomitant medication
- Results of relevant examinations
- Laboratory printouts
- Dispensing and return of study drug details

- Reason for premature discontinuation
- Randomization number

## **11 STATISTICS**

### **11.1 Statistical and Analytical Plans**

The overall aim of this randomised, double-blind, crossover placebo controlled study is to investigate the impact of nocturnal sodium oxybate application on daytime sleepiness. Furthermore, we are examining the safety of the treatment and its impact on motor and other non-motor symptoms and quality of life of PD patients and their partners/caregivers. All results will be quantified, either by validated scales (as given above), or by sleep tests. The numerical outcomes will be used for state-of-the-art statistical analyses. Group data will be described by means and standard deviations. For normally distributed values, the significance of differences in means will be assessed by independent Student t-test, Pearson correlation analyses, one-way ANOVA, and repeated-measures ANOVA (IBM SPSS Statistics, 21 for Windows), where appropriate. ANOVA will be followed by post hoc comparisons to determine group differences. For non-normally distributed values, we will apply U Mann-Whitney tests, and Spearman correlation analyses. We will use multinomial regression to assess the influence of cofactors on endpoints.

### **11.2 Hypotheses**

Based on the above mentioned considerations, we hypothesize that

- 6 weeks of nocturnal sodium oxybate treatment improves nocturnal sleep and excessive daytime sleepiness in PD patients significantly more than 6 weeks of placebo treatment
- 6 weeks of nocturnal sodium oxybate treatment improves improves motor symptoms (i.e. motor function) and non-motor symptoms (i.e. cognition, fatigue and depression) in PD patients significantly more than 6 weeks of placebo treatment
- 6 weeks of nocturnal sodium oxybate treatment improves quality of life of partners and caregivers significantly more than 6 weeks of placebo treatment

### **11.3 Handling of Missing Data**

Withdrawn subjects will be replaced by another subject of same gender and will receive same therapy regimen. Hence, data of drop-out subjects will not be included in the final statistical analysis. Data of withdrawn subjects will be stored and handled in the same manner as the data of regular assigned subjects.

## 11.4 Determination of Sample Size

Sample size for the human study: based on results from Ondo et al. [6], we used the following parameters for the calculation of sample size: differences in sleepiness ( $15.6 \pm 4.2$  before and  $9.0 \pm 5.0$  after treatment with sodium oxybate). Based on these results, an alpha value of 0.05 and a requested power of 0.95 in a two-tailed sample, the effect size resulted in 1.56 and the total sample size in 12 (2x12 for crossover trial). To have a safety margin, we increase the number of subjects to 16.

## 12 DATA HANDLING AND RECORD KEEPING

The study will strictly follow the protocol. If any changes become necessary, they must be laid down in an amendment to the protocol. All amendments of the protocol must be signed by the Sponsor-Investigator and submitted to IEC and Swissmedic.

The investigators will use electronic case report forms (eCRF), one for each enrolled study participant, to be filled in with all relevant data pertaining to the subject during the study. All subjects who either entered the study or were considered not-eligible or were eligible but not enrolled into the study additionally have to be documented on a screening log. The investigator will document the participation of each study subject on the Enrollment Log.

For data and query management, monitoring, reporting and coding an internet-based secure data base secuTrial® developed in agreement to the Good Clinical Practice (GCP) guidelines provided by the Clinical Trials Center (CTC) Zurich will be used for this study. It is the responsibility of the investigator to assure that all data in the course of the study will be entered completely and correctly in the respective data base. Corrections in the eCRF may only be done by the investigator or by other authorised persons. In case of corrections the original data entries will be archived in the system and can be made visible. For all data entries and corrections date, time of day and person who is performing the entries will be generated automatically.

eCRFs must be kept current to reflect subject status at each phase during the course of study. Subjects must not to be identified in the eCRF by name. Appropriate coded identification (i.e. consecutive Patient Numbers) must be used.

It must be assured that any authorised person, who may perform data entries and changes in the eCRF, can be identified. A list with signatures and initials of all authorised persons will be filed in the study site file and the trial master file, respectively.

Documented medical histories and narrative statements relative to the subject's progress during the study will be maintained. These records will also include the following: originals or copies of laboratory and other medical test results (e.g. ECGs, etc.) which must be kept on file with the individual subject's eCRF.

The investigators assure to perform a complete and accurate documentation of the subject data in the eCRF. All data entered into the eCRF must also be available in the individual subject file either as print-outs or as notes taken by either the investigator or another responsible person assigned by the investigator.

Essential documents must be retained for at least 10 years after the regular end or a premature termination of the respective study (VKlin Art. 25).

Any patient files and source data must be archived for the longest possible period of time according to the feasibility of the investigational site, e.g. hospital, institution or private practice.

### **13 CONFIDENTIALITY**

The investigators are liable to treat the entire information related to the study and the compiled data strictly confidentially. Any passing-on of information to persons that are not directly involved in the study must be approved by the owner of the information.

Data generation, transmission, archiving and analysis of personal data within this study, strictly follows the current Swiss legal requirements for data protection. Prerequisite is the voluntary approval of the subject given by signing the informed consent prior start of participation of the clinical trial.

Individual subject medical information obtained as a result of this study is considered confidential and disclosure to third parties is prohibited. Subject confidentiality will be further ensured by utilising subject identification code numbers to correspond to treatment data in the computer files.

Such medical information may be given to the subject's personal physician or to other appropriate medical personnel responsible for the subject's welfare, if the patient has given his/her written consent to do so.

Data generated as a result of this study are to be available for inspection on request by the monitors, by the IEC and the regulatory health authorities.

### **14 INSURANCE**

Insurance is covered by "Haftpflichtversicherung für den Kanton Zürich betreffend das UniversitätsSpital Zürich" (Policy no.: 1149).

Any damage developed in relation to study participation is covered by this insurance. So as not to forfeit their insurance cover, the subjects themselves must strictly follow the instructions of the study personell. Subjects must not be involved in any other medical treatment without permission of the principal investigator (emergency excluded). Medical emergency treatment must be reported immediately to the investigator. The investigator must also be informed instantly, in the event of health problems or other damages during or after the course of study treatment.

The investigator will allow delegates of the insurance company to have access to the source data/documents as necessary to clarify a case of damage related to study participation. All involved parties will keep the patient data strictly confidential.

A copy of the insurance certificate will be placed in the Investigator's Site File.

## **15 STUDY REGISTRATION**

The study is/will be registered in the local trial registry of the University Hospital Zürich („Studienregister USZ“) and in an international trial registry, i.e. ClinicalTrials.gov (clinicaltrials.gov).

## **16 PUBLICATION POLICY**

After the statistical analysis of this trial the sponsor will make every endeavour to publish the data in a medical journal.



## 17 SIGNATURES

### **Sponsor-Investigator (Principal Investigator):**

This clinical trial protocol was subject to critical review and has been approved by the Sponsor-Investigator. The information herein is consistent with

- the current risk/benefit evaluation of the investigational product(s)
- the moral, ethical and scientific principles governing clinical research as set out in the current version of the Declaration of Helsinki, Good Clinical Practice and the respective SAMW guidelines.

Christian Baumann

---

Place/Date

---

Signature

## 18 REFERENCES

1. Merlino G, Piani A, Gigli GL, Cancelli I, Rinaldi A, et al. (2010) Daytime sleepiness is associated with dementia and cognitive decline in older Italian adults: A population-based study. *Sleep Medicine* 11: 372-377.
2. Valko PO, Waldvogel D, Weller M, Bassetti CL, Held U, et al. (2010) Fatigue and excessive daytime sleepiness in idiopathic Parkinson's disease differently correlate with motor symptoms, depression and dopaminergic treatment. *European Journal of Neurology* 17: 1428-1436.
3. Arnulf I, Leu S, Oudiette D (2008) Abnormal sleep and sleepiness in Parkinson's disease. *Curr Opin Neurol* 21: 472-477.
4. Kang JE, Lim MM, Bateman RJ, Lee JJ, Smyth LP, et al. (2009) Amyloid-beta dynamics are regulated by orexin and the sleep-wake cycle. *Science* 326: 1005-1007.
5. Naidoo N, Ferber M, Master M, Zhu Y, Pack AI (2008) Aging impairs the unfolded protein response to sleep deprivation and leads to proapoptotic signaling. *J Neurosci* 28: 6539-6548.
6. Ondo WG, Perkins T, Swick T, Hull KL, Jr., Jimenez JE, et al. (2008) Sodium oxybate for excessive daytime sleepiness in Parkinson disease: an open-label polysomnographic study. *Arch Neurol* 65: 1337-1340.
7. Littner MR, Kushida C, Wise M, Davila DG, Morgenthaler T, et al. (2005) Practice parameters for clinical use of the multiple sleep latency test and the maintenance of wakefulness test. *Sleep* 28: 113-121.
8. Iber C, Ancoli-Israel S, Chesson A, Quan SF (2007) *The AASM Manual for the Scoring of Sleep and Associated Events: Rules, Terminology and Technical Specifications*. Westchester, IL: American Academy of Sleep Medicine.
9. Fronczek R, Middelkoop HA, van Dijk JG, Lammers GJ (2006) Focusing on vigilance instead of sleepiness in the assessment of narcolepsy: high sensitivity of the Sustained Attention to Response Task (SART). *Sleep* 29: 187-191.
10. Dinges D, Powell J (1985) Microcomputer analyses of performance on a portable, simple visual RT task during sustained operations. *Behavior Research Methods* 17: 652-655.
11. King MA, Jaffre MO, Morrish E, Shneerson JM, Smith IE (2005) The validation of a new actigraphy system for the measurement of periodic leg movements in sleep. *Sleep Med* 6: 507-513.
12. Braun M, Scholz U, Hornung R, Martin M (2010) [Caregiver burden with dementia patients. A validation study of the German language version of the Zarit Burden Interview]. *Z Gerontol Geriatr* 43: 111-119.
13. Martínez-Martín P, Forjaz MJ, Frades-Payo B, Rusiñol AB, Fernández-García JM, et al. (2007) Caregiver burden in Parkinson's disease. *Movement Disorders* 22: 924-931.
14. Gelb DJ, Oliver E, Gilman S (1999) Diagnostic criteria for Parkinson disease. *Arch Neurol* 56: 33-39.

## 19 APPENDIX

### Text for advertisement in *Parkinson Schweiz*:

„Teilnehmer für Studie zur Therapie von Schläfrigkeit bei Parkinson gesucht“

Im Rahmen einer wissenschaftlichen Studie zu übermässiger Schläfrigkeit bei Parkinson-Syndrom untersuchen wir an der Klinik für Neurologie des UniversitätsSpitals Zürich den Effekt eines Medikamentes an Parkinsonpatienten mit dem Ziel diese Schläfrigkeit zu lindern. Gemäss strenger wissenschaftlicher und ethischer Kriterien wird bei einer Gesamtstudiendauer von 16 Wochen über 6 Wochen mit dem Studienmedikament und 6 Wochen mit Placebo behandelt. Der Effekt von Medikament bzw. Placebo auf Tagesschläfrigkeit und Schlafqualität wird in insgesamt 8 Visiten untersucht. Für eine Teilnahme geeignet sind Patienten mit einer stabilen Parkinson-Medikation, die unter einer Tagesschläfrigkeit und gestörtem Nachtschlaf leiden. Sämtliche Angaben im Rahmen dieser Studie werden vertraulich behandelt. Für medizinische Fragen ausserhalb der Studie ist weiterhin der Hausarzt zuständig. Bitte kontaktieren Sie uns gerne für weitergehende schriftliche Informationen [REDACTED]  
[REDACTED]  
[REDACTED]

Example of investigational product label:

|                                                                                                                                                                                                                                                                                                                                                                                                                                                                                                                                                                                        |                                                            |
|----------------------------------------------------------------------------------------------------------------------------------------------------------------------------------------------------------------------------------------------------------------------------------------------------------------------------------------------------------------------------------------------------------------------------------------------------------------------------------------------------------------------------------------------------------------------------------------|------------------------------------------------------------|
| <p><b>KANTONSAPOTHEKE ZÜRICH</b><br/><b>PD Xyrem - Studie KEK Nr. #####</b><br/>Rand.Nr: <b>A-P</b>      Medikament: <b>1 oder 2</b><br/><b>Xyrem Lös 500mg/ml Na-Oxybat oder Placebo</b><br/>Einnahme gemäss Anleitung zur Studienmedikationseinnahme<br/>Dosierung gemäss Medikationstagebuch</p> <div style="border: 1px solid black; padding: 5px; text-align: center;"><p>Nur zur klinischen Prüfung bestimmt<br/>Für Kinder unzugänglich aufbewahren<br/>Bei Raumtemperatur (15-25 °C) lagern</p></div> <p>Dr. Ch. Baumann, Klinik für Neurologie, UniversitätsSpital Zürich</p> | <p>Exp:</p><br><br><br><br><br><br><br><br><br><p>Lot:</p> |
|----------------------------------------------------------------------------------------------------------------------------------------------------------------------------------------------------------------------------------------------------------------------------------------------------------------------------------------------------------------------------------------------------------------------------------------------------------------------------------------------------------------------------------------------------------------------------------------|------------------------------------------------------------|

## UPDRS III

Patientenetikette:

Datum: \_\_\_\_\_

Visite \_\_\_\_\_ Uhrzeit \_\_\_\_\_

ON  OFF

UPDRS III:

18. Sprache:

- 0 - Normal
- 1 - Leichte Abnahme von Ausdruck, Diktion und/oder Volumen.
- 2 - Monoton, verwaschen, aber verständlich; mäßig behindert.
- 3 - Deutliche Beeinträchtigung, schwer zu verstehen
- 4 - Unverständlich.

19. Gesichtsausdruck:

- 0 - Normal
- 1 - Minimal veränderte Mimik, könnte ein normales "Pokergesicht" sein.
- 2 - Leichte, aber eindeutig abnorme Verminderung des Gesichtsausdruckes.
- 3 - Mäßig verminderte Mimik; Lippen zeitweise geöffnet.
- 4 - Maskenhaftes oder erstarrtes Gesicht mit stark oder völlig fehlendem Ausdruck; Lippen stehen um 7 mm auseinander.

20. Ruhetremor: (G = Gesicht, RH = rechte Hand, LH = linke Hand, RF = rechter

Fuß, LF = linker Fuß)

G RH LH RF LF

- 0 - Keine.
- 1 - Leicht und selten vorhanden.
- 2 - Geringe Amplitude persistierend; oder mäßige Amplitude, aber nur intermittierend auftretend.
- 3 - Mäßige Amplitude, die meiste Zeit vorhanden.
- 4 - Ausgeprägte Amplitude, die meiste Zeit vorhanden

21. Aktions- oder Haltungstremor der Hände: (R = rechts, L = links):

R L

- 0 - Fehlt.
- 1 - Leicht; bei Bewegung vorhanden.
- 2 - Mäßige Amplitude, bei Bewegung vorhanden
- 3 - Mäßige Amplitude, bei Beibehalten der Haltung und bei Bewegung vorhanden.
- 4 - Ausgeprägte Amplitude; beim Essen störend.

22. Rigidity: (Geprüft bei passiver Bewegung der großen Gelenke am sitzenden Patienten. Zahnradphänomen kann ignoriert werden). (N = Nacken, ROE = rechte obere Extremität, LOE = linke obere Extremität, RUE = rechte untere Extremität, LUE = linke untere Extremität)

N ROE LOE RUE LUE

- 0 - Fehlt.
- 1 - Leicht oder nur erkennbar bei Aktivierung durch spiegelbildliche oder andere Bewegungen.
- 2 - Leicht bis mäßig.
- 3 - Ausgeprägt, jedoch voller Bewegungsumfang bleibt erreicht.
- 4 - Stark; Schwierigkeit beim Ausführen aller Bewegungen.

23. Fingerklopfen: (Patient berührt in rascher Reihenfolge und bei größtmöglicher Amplitude und mit jeder Hand gesondert den Daumen mit dem Zeigefinger). (R = rechts, L = links)

R L

- 0 - Normal.
- 1 - Leichte Verlangsamung und/oder Verringerung der Amplitude.
- 2 - Mäßig eingeschränkt. Eindeutige und frühzeitige Ermüdung. Bewegung kann gelegentlich unterbrochen werden.
- 3 - Stark eingeschränkt. Verzögerter Start der Bewegungen oder Unterbrechung fortlaufender Bewegungen.
- 4 - Kann die Aufgabe kaum ausführen.

Seite 1 von 3

Version 1.2, 15.02.2013

24. Handbewegungen: (Patient öffnet und schließt die Hände in rascher Reihenfolge bei größtmöglicher Amplitude und mit jeder Hand gesondert). (R = rechts, L = links)

R L

- 0 - Normal.
- 1 - Leichte Verlangsamung und/oder Verringerung der Amplitude.
- 2 - Mäßig eingeschränkt. Eindeutige und frühzeitige Ermüdung. Bewegung kann gelegentlich unterbrochen werden.
- 3 - Stark eingeschränkt. Verzögerter Start der Bewegungen oder Unterbrechung fortlaufender Bewegungen.
- 4 - Kann die Aufgabe kaum ausführen.

25. Rasch wechselnde Bewegungen der Hände: (Pronation-Supinationsbewegungen der Hände, vertikal oder horizontal, mit größtmöglicher Amplitude, beide Hände gleichzeitig).

R L

- 0 - Normal.
- 1 - Leichte Verlangsamung und/oder Verringerung der Amplitude
- 2 - Mäßig eingeschränkt. Eindeutige und frühzeitige Ermüdung. Bewegung kann gelegentlich unterbrochen werden.
- 3 - Stark eingeschränkt. Verzögerter Start der Bewegungen oder Unterbrechung fortlaufender Bewegungen.
- 4 - Kann die Aufgabe kaum ausführen.

26. Agilität der Beine: (Der Patient klopft in rascher Reihenfolge mit der Ferse auf den Boden und hebt dabei das ganze Bein an. Die Amplitude soll mindestens 7,5 cm betragen)

R L

- 0 - Normal.
- 1 - Leichte Verlangsamung und/oder Verringerung der Amplitude.
- 2 - Mäßig eingeschränkt. Eindeutige und frühzeitige Ermüdung. Bewegung kann gelegentlich unterbrochen werden.
- 3 - Stark eingeschränkt. Verzögerter Start der Bewegungen oder Unterbrechung fortlaufender Bewegungen.
- 4 - Kann die Aufgabe kaum ausführen.

27. Aufstehen vom Stuhl: (Patient versucht mit vor der Brust verschränkten Armen von einem geradelehnten Holz- oder Metallstuhl aufzustehen):

- 0 - Normal
- 1 - Langsam; kann mehr als einen Versuch benötigen.
- 2 - Stößt sich an den Armlehnen hoch.
- 3 - Neigt zum Zurückfallen und muß es eventuell mehrmals versuchen, kann jedoch ohne Hilfe aufstehen
- 4 - Kann ohne Hilfe nicht aufstehen

28. Haltung:

- 0 - Normal aufrecht:
- 1 - Nicht ganz aufrecht, leicht vorgebeugte Haltung; könnte bei einem älteren Menschen normal sein.
- 2 - Mäßig vorgebeugte Haltung; eindeutig abnorm, kann leicht zu einer Seite geneigt sein.
- 3 - Stark vorgebeugte Haltung mit Kyphose; kann mäßig zu einer Seite geneigt sein
- 4 - Ausgeprägte Beugung mit extrem abnormer Haltung.

29. Gang:

- 0 - Normal.
- 1 - Geht langsam, kann einige kurze Schritte schlurfen, jedoch keine Festination oder Propulsion.
- 2 - Gehen schwierig, benötigt aber wenig oder keine Hilfe; eventuell leichtes Trippeln, kurze Schritte oder Propulsion.
- 3 - Starke Gehstörung, benötigt Hilfe.
- 4 - Kann überhaupt nicht gehen, auch nicht mit Hilfe

Seite 2 von 3

Version 1.1, 24.01.2013

30. Haltungsverstabilität: (Reaktion auf plötzliches Verlagern nach hinten durch Ziehen an den Schultern des Patienten; der mit geöffneten Augen und leicht auseinanderstehenden Füßen geradesteht. Der Patient ist darauf vorbereitet)
- 0 - Normal
  - 1 - Retropulsion, gleicht aber ohne Hilfe aus.
  - 2 - Fehlen einer Haltungsreaktion; würde fallen, wenn er nicht vom Untersucher aufgefangen würde
  - 3 - Sehr instabil; neigt dazu, spontan das Gleichgewicht zu verlieren.
  - 4 - Kann nicht ohne Unterstützung stehen.
31. Bradykinesie und Hypokinesie des Körpers: (Kombination aus Langsamkeit, Zögern, verminderten Mitbewegungen der Arme, geringe Bewegungsamplitude und allgemeine Bewegungsarmut)
- 0 - Keine .
  - 1 - Minimale Verlangsamung, Bewegung wirkt beabsichtigt; könnte bei manchen Menschen normal sein. Möglicherweise herabgesetzte Amplitude.
  - 2 - Leichte Verlangsamung und Bewegungsarmut, die eindeutig abnorm sind. Alternativ auch herabgesetzte Amplitude.
  - 3 - Mäßige Verlangsamung und Bewegungsarmut oder Herabsetzung der Amplitude.
  - 4 - Ausgeprägte Verlangsamung, Bewegungsarmut oder Herabsetzung der Amplitude.

TOTAL PUNKTE: \_\_\_\_\_ IN      ON       OFF

## HADS:

Patientenetikette:

Datum: \_\_\_\_\_

Visite \_\_\_\_\_ Uhrzeit \_\_\_\_\_

### HADS:

Dieser Fragebogen bezieht sich auf Ihr Befinden innerhalb der vergangenen Woche. Suchen Sie bitte eine Aussage in der Gruppe heraus, die am besten beschreibt, wie Sie sich in dieser Woche einschliesslich heute gefühlt habe!

Ich fühle mich angespannt und überreizt.

- Meistens
- oft
- von Zeit zu Zeit / gelegentlich
- überhaupt nicht

Ich kann mich heute noch so freuen wie früher.

- ganz genau so
- nicht ganz so sehr
- nur noch ein wenig
- kaum oder gar nicht

Mich überkommt eine ängstliche Vorahnung, dass etwas Schreckliches passieren könnte

- ja, sehr stark
- ja, aber nicht allzu stark
- etwas, aber es macht mir keine Sorgen
- überhaupt nicht

Ich kann lachen und die lustigen Dinge sehen.

- ja, so viel wie immer
- nicht mehr ganz so viel
- inzwischen viel weniger
- überhaupt nicht

Mir gehen beunruhigende Gedanken durch den Kopf.

- einen Grossteil der Zeit
- verhältnismässig oft
- von Zeit zu Zeit, aber nicht allzu oft
- nur gelegentlich / nie

Ich fühle mich glücklich

Version 1.2, 15.02.2013

Seite 1 von 3



- überhaupt nicht
- selten
- manchmal
- meistens

Ich kann behaglich dasitzen und mich entspannen.

- ja, natürlich
- gewöhnlich schon
- nicht oft
- überhaupt nicht

Ich fühle mich in meinen Aktivitäten gebremst.

- fast immer
- sehr oft
- manchmal
- überhaupt nicht

Ich habe manchmal ein ängstliches Gefühl in der Magengegend.

- überhaupt nicht
- gelegentlich
- ziemlich oft
- sehr oft

Ich habe das Interesse an meiner äusseren Erscheinung verloren.

- ja, das stimmt genau
- ich kümmere mich nicht so darum, wie ich sollte
- evtl. kümmere ich mich zu wenig darum
- ich kümmere mich so viel darum wie immer

Ich fühle mich rastlos, muss immer in Bewegung sein.

- ja, tatsächlich sehr
- ziemlich
- nicht sehr
- überhaupt nicht

Ich blicke mit Freude in die Zukunft.

- ja, sehr
- eher weniger als früher
- viel weniger als früher
- kaum bis gar nicht

Mich überkommt plötzlich ein panikartiger Zustand.

- ja, tatsächlich sehr oft
- ziemlich oft
- nicht sehr oft
- überhaupt nicht

Ich kann mich an einem guten Buch, einer Radio- oder Fernsehsendung freuen.

- oft
- manchmal
- eher selten
- sehr selten

TOTAL PUNKTE: \_\_\_\_\_

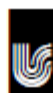

### Epworth Sleepiness Scale

|                                                           |
|-----------------------------------------------------------|
| Patientenetikette:                                        |
| Visite: <span style="float: right;">ausgefüllt am:</span> |

Prof. Dr. med. M. Weller  
Klinikdirektor

UniversitätsSpital Zürich  
Klinik für Neurologie  
Frauenklinikstrasse 26  
CH-8091 Zürich  
www.neurologie.usz.ch

#### Wie leicht fällt es Ihnen, in folgenden Situationen einzuschlafen?

Gemeint ist nicht nur das Gefühl müde zu sein, sondern auch **wirklich einzuschlafen**. Die Frage bezieht sich auf das übliche tägliche Leben der vergangenen Wochen.

Auch wenn Sie einige der beschriebenen Tätigkeiten in letzter Zeit nicht ausgeführt haben, versuchen Sie sich vorzustellen, welche Wirkung diese auf Sie gehabt hätten.

Abteilung für Schlafmedizin  
PD Dr. C. Baumann, Leiter  
Dr. E. Werth, Somnologin

Schlafsprechstunde  
Tel. 044 255 55 91  
Fax 044 255 88 64  
Schlaflabor  
Tel. 044 255 55 75  
Fax 044 255 88 64

Wählen Sie aus der folgenden Skala die für die entsprechende Frage am besten zutreffende Zahl:

- 0= würde nie einschlafen
- 1= würde kaum einschlafen
- 2= würde möglicherweise einschlafen
- 3= würde mit grosser Wahrscheinlichkeit einschlafen

zutreffendes bitte ankreuzen!

|                                                                     |                            |                            |                            |                            |
|---------------------------------------------------------------------|----------------------------|----------------------------|----------------------------|----------------------------|
| Sitzen und Lesen                                                    | <input type="checkbox"/> 0 | <input type="checkbox"/> 1 | <input type="checkbox"/> 2 | <input type="checkbox"/> 3 |
| Fernsehen                                                           | <input type="checkbox"/> 0 | <input type="checkbox"/> 1 | <input type="checkbox"/> 2 | <input type="checkbox"/> 3 |
| Sitzen an einem öffentlichen Ort (z.B. Theater, Sitzung, Vortrag)   | <input type="checkbox"/> 0 | <input type="checkbox"/> 1 | <input type="checkbox"/> 2 | <input type="checkbox"/> 3 |
| Als Mitfahrer im Auto während 1 Stunde ohne Halt                    | <input type="checkbox"/> 0 | <input type="checkbox"/> 1 | <input type="checkbox"/> 2 | <input type="checkbox"/> 3 |
| Abliegen um auszuruhen am Nachmittag, wenn es die Umstände erlauben | <input type="checkbox"/> 0 | <input type="checkbox"/> 1 | <input type="checkbox"/> 2 | <input type="checkbox"/> 3 |
| Sitzen und mit jemandem sprechen                                    | <input type="checkbox"/> 0 | <input type="checkbox"/> 1 | <input type="checkbox"/> 2 | <input type="checkbox"/> 3 |
| Ruhig sitzen nach Mittagessen ohne Alkohol                          | <input type="checkbox"/> 0 | <input type="checkbox"/> 1 | <input type="checkbox"/> 2 | <input type="checkbox"/> 3 |
| Im Auto beim Stop an einer Verkehrsampel während einigen Minuten    | <input type="checkbox"/> 0 | <input type="checkbox"/> 1 | <input type="checkbox"/> 2 | <input type="checkbox"/> 3 |

|                           |     |
|---------------------------|-----|
| Epworth Sleepiness Score: | /24 |
|---------------------------|-----|

FSS:

### Fatigue Severity Scale

Prof. Dr. med. M. Weller  
Klinikdirektor

UniversitätsSpital Zürich  
Klinik für Neurologie  
Frauenklinikstrasse 26  
CH-8091 Zürich  
www.neurologie.usz.ch

Patientenetikette:

Heutiges Datum:

Visite

Abteilung für Schlafmedizin  
PD Dr. C. Baumann, Leiter  
Dr. E. Werth, Somnologin

Schlafsprechstunde  
Tel. 044 255 55 91  
Fax 044 255 88 64  
Schlaflabor  
Tel. 044 255 55 75  
Fax 044 255 88 64

**Ich finde, dass während der vergangenen Woche Folgendes zutrifft:**

| zu                                                                                         | Stimme gar nicht zu <span style="float:right">Stimme vollkommen</span> |                          |                          |                          |                          |                          |                          |
|--------------------------------------------------------------------------------------------|------------------------------------------------------------------------|--------------------------|--------------------------|--------------------------|--------------------------|--------------------------|--------------------------|
|                                                                                            | ← 1 2 3 4 5 6 7 →                                                      |                          |                          |                          |                          |                          |                          |
| 1. Ich bin weniger motiviert, wenn ich müde bin.                                           | <input type="checkbox"/>                                               | <input type="checkbox"/> | <input type="checkbox"/> | <input type="checkbox"/> | <input type="checkbox"/> | <input type="checkbox"/> | <input type="checkbox"/> |
| 2. Körperliche Bewegung macht mich müde.                                                   | <input type="checkbox"/>                                               | <input type="checkbox"/> | <input type="checkbox"/> | <input type="checkbox"/> | <input type="checkbox"/> | <input type="checkbox"/> | <input type="checkbox"/> |
| 3. Ich ermüde rasch.                                                                       | <input type="checkbox"/>                                               | <input type="checkbox"/> | <input type="checkbox"/> | <input type="checkbox"/> | <input type="checkbox"/> | <input type="checkbox"/> | <input type="checkbox"/> |
| 4. Meine Müdigkeit beeinträchtigt meine körperliche Leistungsfähigkeit.                    | <input type="checkbox"/>                                               | <input type="checkbox"/> | <input type="checkbox"/> | <input type="checkbox"/> | <input type="checkbox"/> | <input type="checkbox"/> | <input type="checkbox"/> |
| 5. Meine Müdigkeit bereitet mir oft Probleme.                                              | <input type="checkbox"/>                                               | <input type="checkbox"/> | <input type="checkbox"/> | <input type="checkbox"/> | <input type="checkbox"/> | <input type="checkbox"/> | <input type="checkbox"/> |
| 6. Meine Müdigkeit verhindert längerdauernde körperliche Tätigkeiten.                      | <input type="checkbox"/>                                               | <input type="checkbox"/> | <input type="checkbox"/> | <input type="checkbox"/> | <input type="checkbox"/> | <input type="checkbox"/> | <input type="checkbox"/> |
| 7. Meine Müdigkeit beeinträchtigt mich, gewisse Pflichten und Verantwortungen zu erfüllen. | <input type="checkbox"/>                                               | <input type="checkbox"/> | <input type="checkbox"/> | <input type="checkbox"/> | <input type="checkbox"/> | <input type="checkbox"/> | <input type="checkbox"/> |
| 8. Meine Müdigkeit gehört zu den drei Beschwerden, die mich am meisten behindern.          | <input type="checkbox"/>                                               | <input type="checkbox"/> | <input type="checkbox"/> | <input type="checkbox"/> | <input type="checkbox"/> | <input type="checkbox"/> | <input type="checkbox"/> |
| 9. Meine Müdigkeit beeinträchtigt meine Arbeit, meine Familie oder mein soziales Leben.    | <input type="checkbox"/>                                               | <input type="checkbox"/> | <input type="checkbox"/> | <input type="checkbox"/> | <input type="checkbox"/> | <input type="checkbox"/> | <input type="checkbox"/> |

Markieren Sie bitte auf der folgenden Linie Ihre durchschnittliche Tagesmüdigkeit:

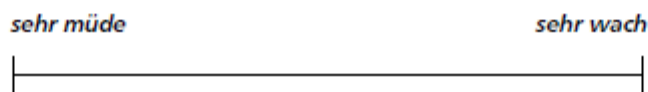

**Kreuzen Sie die Aussage an, die Ihren momentanen Wachheits- oder Schläfrigkeitzzustand am besten beschreibt.**

1. Ich fühle mich aktiv, vital, aufgeschlossen, hellwach.
2. Ich bin zwar in guter, nicht aber in Top-Form; kann mich konzentrieren.
3. Ich bin entspannt und wach, wenn auch nicht voll aufnahmefähig.
4. Ich fühle mich ein wenig benebelt und nicht mehr leistungsfähig.
5. Ich fühle mich benebelt und kriege nicht mehr alles mit; mir fällt es schwer, wach zu bleiben.
6. Ich möchte mich gerne hinlegen und schlafen; ich bin benommen.
7. Ich bin fast weggetreten, kann nicht wach bleiben und fürchte, jeden Moment einzuschlafen.

---

**Bitte bewerten Sie Ihre Schläfrigkeit der letzten 10 Minuten, indem Sie unten die entsprechende Zahl ankreuzen. Benutzen Sie auch die Zwischenstufungen!**

1. sehr wach
- 2.
3. wach - normaler Level
- 4.
5. weder wach noch schläfrig
- 6.
7. schläfrig, aber keine Probleme wach zu bleiben
- 8.
9. sehr schläfrig, grosse Probleme wach zu bleiben, mit dem Schlaf kämpfend

Prof. Dr. med. M. Weller  
Klinikdirektor

Abteilung für Schlafmedizin  
PD Dr. C. Baumann, Leiter  
Dr. E. Werth, Somnologin

*Schlafsprechstunde*  
Tel. 044 255 55 91  
Fax 044 255 88 64  
*Schlaflabor*  
Tel. 044 255 55 75  
Fax 044 255 88 64

## **Einwilligungserklärung von Patienten für Foto- und Videoaufnahmen**

Ich bin damit einverstanden, dass die von mir gemachten Foto- und/oder Videoaufnahmen zu Lehrzwecken (Vorlesungen, Kurse, Vorträge) oder für wissenschaftliche Mitteilungen/Veröffentlichungen verwendet werden.

Ich bin mir bewusst, dass ich auf den Aufnahmen unter Umständen persönlich erkennbar bin. Die Aufnahmen sind jedoch insofern anonymisiert, als sich keine persönlichen Daten (wie Namen, Geburtsdatum, Patientenummer usw.) darauf befinden. Meine persönlichen Daten werden vertraulich behandelt und nur an der Klinik geführt und archiviert.

**Unterschrift der Patientin/des Patienten**

**Unterschrift des behandelnden Arztes**

.....

.....

Zürich,

## Medikamentenblatt

Name: \_\_\_\_\_ Geburtsdatum \_\_\_\_\_ heutiges Datum \_\_\_\_\_

Es ist wichtig zu wissen, welche Medikamente Sie einnehmen, da einige Wirksubstanzen unsere Messungen beeinflussen und wir sie in unserer Beurteilung mit einbeziehen müssen.

Bitte geben sie uns Namen, Einnahmezeitpunkt und Dosierung des Medikaments an.

| <b>am <u>heutigen Tag</u> eingenommene Medikamente:</b> | <b>regelmässig eingenommen? (ja/nein)</b> |
|---------------------------------------------------------|-------------------------------------------|
| am Morgen:                                              |                                           |
| am Mittag:                                              |                                           |
| am Abend:                                               |                                           |
| vor dem Zubettgehen                                     |                                           |

| <b>weitere Medikamente, die sie regelmässig/unregelmässig in den <u>letzten 14 Tagen</u> eingenommen haben</b> | <b>regelmässig eingenommen? (ja/nein)</b> |
|----------------------------------------------------------------------------------------------------------------|-------------------------------------------|
| am Morgen:                                                                                                     |                                           |
| am Mittag:                                                                                                     |                                           |
| am Abend:                                                                                                      |                                           |
| vor dem Zubettgehen                                                                                            |                                           |

**Mussten sie vor der Schlafuntersuchung gewisse Medikamente stoppen?  
Wenn ja, welche und seit wann?**





Am Abend vom Patienten auszufüllen: Datum:\_\_\_\_\_

Name, Vorname:\_\_\_\_\_  
geb.:\_\_\_\_\_

Gewicht:\_\_\_\_\_kg Grösse:\_\_\_\_\_m

1. Haben Sie letzte Nacht normal (durchschnittlich) geschlafen?

ja

nein

wenn nein, weshalb nicht:\_\_\_\_\_

2. Haben Sie, seit Sie heute morgen aufgewacht sind, ein Nickerchen gemacht?

ja

nein

falls ja, wann und wie lange?\_\_\_\_\_

3. Haben Sie von folgendem während den letzten 12 Std. etwas zu sich genommen?

| Kaffee / koffeinhaltige Getränke | Schwarz/Grüntee | Orangensaft | Alkohol |
|----------------------------------|-----------------|-------------|---------|
| ja                               | ja              | ja          | ja      |
| nein                             | nein            | nein        | nein    |

4. Hat Sie heute etwas aus der Fassung gebracht, haben Sie sich aufgeregt oder sich wegen etwas Sorgen gemacht?

ja

nein

falls ja, beschreiben Sie bitte das Ereignis:\_\_\_\_\_

5. Hat sich heute etwas Aussergewöhnliches für Sie ereignet?

ja

nein

falls ja, beschreiben Sie bitte das Ereignis:\_\_\_\_\_

6.

|                                     | überhaupt nicht | ein wenig | ziemlich | sehr |
|-------------------------------------|-----------------|-----------|----------|------|
| Wie müde fühlen Sie sich im Moment? |                 |           |          |      |
| Wie schläfrig?                      |                 |           |          |      |
| Wie aufmerksam?                     |                 |           |          |      |

**Vom Patienten am Morgen auszufüllen, frühestens 15 Minuten nach dem Aufstehen.**

Uhrzeit:\_\_\_\_\_

**1. Wie haben Sie geschlafen im Vergleich mit zu Hause?**

gleich                                          besser                                          schlechter

falls schlechter, warum:\_\_\_\_\_

**Bitte schätzen Sie bei den Fragen 2 bis 5 die Zeiten nach Ihrem eigenen Gefühl.**

2. Wie lange dauerte die Einschlafzeit? \_\_\_\_\_Std./Min

3. Wie lange haben Sie geschlafen? \_\_\_\_\_Std./Min

4. Wie viel mal sind Sie aufgewacht? \_\_\_\_\_Mal

5. Wie lange sind Sie wachgelegen (ohne Einschlafzeit)? \_\_\_\_\_Std./Min

6. Haben Sie geträumt?

ja                                          nein                                          weiss nicht

7. Haben Sie etwas Befremdendes gespürt, gehört oder gesehen?

ja  
nein

falls ja, beschreiben Sie es bitte:\_\_\_\_\_

8. Haben Sie die Störung gehabt, wegen der Sie hier sind?

ja                                          nein                                          weiss nicht

falls ja, welche:\_\_\_\_\_

9.

|                                     | überhaupt nicht | ein wenig | ziemlich | sehr |
|-------------------------------------|-----------------|-----------|----------|------|
| Wie müde fühlen Sie sich im Moment? |                 |           |          |      |
| Wie schläfrig?                      |                 |           |          |      |
| Wie aufmerksam?                     |                 |           |          |      |

10. Wie hat es Ihnen im Schlaflabor gefallen, bzw. könnte man etwas verbessern?

---

---

---

---

MoCA:

**MONTREAL COGNITIVE ASSESSMENT (MOCA)**

NAME :  
 Ausbildung :  
 Geschlecht :

Geburtsdatum :  
 DATUM :

|                                                                                   |         |                                                                                                                                                                                   |             |          |               |           |                                                                                                                                                                                                                                                                                                                                                                                                                                                                                                                                                                                                                                                                                                                                                                                                                                                                        |                                              |         |       |        |       |     |            |     |     |     |     |     |            |     |     |     |     |     |              |
|-----------------------------------------------------------------------------------|---------|-----------------------------------------------------------------------------------------------------------------------------------------------------------------------------------|-------------|----------|---------------|-----------|------------------------------------------------------------------------------------------------------------------------------------------------------------------------------------------------------------------------------------------------------------------------------------------------------------------------------------------------------------------------------------------------------------------------------------------------------------------------------------------------------------------------------------------------------------------------------------------------------------------------------------------------------------------------------------------------------------------------------------------------------------------------------------------------------------------------------------------------------------------------|----------------------------------------------|---------|-------|--------|-------|-----|------------|-----|-----|-----|-----|-----|------------|-----|-----|-----|-----|-----|--------------|
| <b>VISUOSPATIAL / EXEKUTIV</b>                                                    |         |  Würfel nachzeichnen                                                                             |             |          |               |           | Eine Uhr zeichnen (Zehn nach elf)<br>( 3 Punkte )                                                                                                                                                                                                                                                                                                                                                                                                                                                                                                                                                                                                                                                                                                                                                                                                                      | <b>PUNKTE</b>                                |         |       |        |       |     |            |     |     |     |     |     |            |     |     |     |     |     |              |
|  |         | [ ]                                                                                                                                                                               | [ ]         | [ ]      | [ ]           | [ ]       | ___/5                                                                                                                                                                                                                                                                                                                                                                                                                                                                                                                                                                                                                                                                                                                                                                                                                                                                  |                                              |         |       |        |       |     |            |     |     |     |     |     |            |     |     |     |     |     |              |
| <b>BENENNEN</b>                                                                   |         |                                                                                                |             |          |               |           | [ ]                                                                                                                                                                                                                                                                                                                                                                                                                                                                                                                                                                                                                                                                                                                                                                                                                                                                    | [ ]                                          | [ ]     | ___/3 |        |       |     |            |     |     |     |     |     |            |     |     |     |     |     |              |
| <b>GEDÄCHTNIS</b>                                                                 |         | Wortliste vorlesen, wiederholen lassen.<br>2 Durchgänge. Nach 5 Minuten überprüfen (s.u.)                                                                                         |             |          |               |           | <table border="1" style="width:100%; border-collapse: collapse;"> <tr> <td></td> <td style="text-align: center;">GESICHT</td> <td style="text-align: center;">SAMT</td> <td style="text-align: center;">KIRCHE</td> <td style="text-align: center;">TULPE</td> <td style="text-align: center;">ROT</td> </tr> <tr> <td style="text-align: center;">1. Versuch</td> <td style="text-align: center;">[ ]</td> </tr> <tr> <td style="text-align: center;">2. Versuch</td> <td style="text-align: center;">[ ]</td> </tr> </table> |                                              | GESICHT | SAMT  | KIRCHE | TULPE | ROT | 1. Versuch | [ ] | [ ] | [ ] | [ ] | [ ] | 2. Versuch | [ ] | [ ] | [ ] | [ ] | [ ] | Keine Punkte |
|                                                                                   | GESICHT | SAMT                                                                                                                                                                              | KIRCHE      | TULPE    | ROT           |           |                                                                                                                                                                                                                                                                                                                                                                                                                                                                                                                                                                                                                                                                                                                                                                                                                                                                        |                                              |         |       |        |       |     |            |     |     |     |     |     |            |     |     |     |     |     |              |
| 1. Versuch                                                                        | [ ]     | [ ]                                                                                                                                                                               | [ ]         | [ ]      | [ ]           |           |                                                                                                                                                                                                                                                                                                                                                                                                                                                                                                                                                                                                                                                                                                                                                                                                                                                                        |                                              |         |       |        |       |     |            |     |     |     |     |     |            |     |     |     |     |     |              |
| 2. Versuch                                                                        | [ ]     | [ ]                                                                                                                                                                               | [ ]         | [ ]      | [ ]           |           |                                                                                                                                                                                                                                                                                                                                                                                                                                                                                                                                                                                                                                                                                                                                                                                                                                                                        |                                              |         |       |        |       |     |            |     |     |     |     |     |            |     |     |     |     |     |              |
| <b>AUFMERKSAMKEIT</b>                                                             |         | Zahlenliste vorlesen (1 Zahl/ Sek.) In der vorgegebenen Reihenfolge wiederholen [ ] 2 1 8 5 4<br>Rückwärts wiederholen [ ] 7 4 2                                                  |             |          |               |           | ___/2                                                                                                                                                                                                                                                                                                                                                                                                                                                                                                                                                                                                                                                                                                                                                                                                                                                                  |                                              |         |       |        |       |     |            |     |     |     |     |     |            |     |     |     |     |     |              |
| <b>AUFMERKSAMKEIT</b>                                                             |         | Buchstabenliste vorlesen (1 Buchst./Sek.). Patient soll bei jedem Buchstaben „A“ mit der Hand klopfen. Keine Punkte bei 2 oder mehr Fehlern<br>[ ] FBACMNAAJKLBAFAKDEAAAJAMOF AAB |             |          |               |           | ___/1                                                                                                                                                                                                                                                                                                                                                                                                                                                                                                                                                                                                                                                                                                                                                                                                                                                                  |                                              |         |       |        |       |     |            |     |     |     |     |     |            |     |     |     |     |     |              |
| <b>AUFMERKSAMKEIT</b>                                                             |         | Fortlaufendes Abziehen von 7, mit 100 anfangen [ ] 93 [ ] 86 [ ] 79 [ ] 72 [ ] 65<br>4 oder 5 korrekte Ergebnisse: 3 P. 2 oder 3 korrekt: 2 P. 1 korrekt: 1 P. 0 korrekt: 0 P.    |             |          |               |           | ___/3                                                                                                                                                                                                                                                                                                                                                                                                                                                                                                                                                                                                                                                                                                                                                                                                                                                                  |                                              |         |       |        |       |     |            |     |     |     |     |     |            |     |     |     |     |     |              |
| <b>SPRACHE</b>                                                                    |         | Wiederholen: „Ich weiß lediglich, dass Hans heute an der Reihe ist zu helfen.“ [ ]<br>„Die Katze versteckte sich immer unter der Couch, wenn die Hunde im Zimmer waren.“ [ ]      |             |          |               |           | ___/2                                                                                                                                                                                                                                                                                                                                                                                                                                                                                                                                                                                                                                                                                                                                                                                                                                                                  |                                              |         |       |        |       |     |            |     |     |     |     |     |            |     |     |     |     |     |              |
| <b>SPRACHE</b>                                                                    |         | Möglichst viele Wörter in einer Minute benennen, die mit dem Buchstaben F beginnen [ ] _____ (N ≥ 11 Wörter)                                                                      |             |          |               |           | ___/1                                                                                                                                                                                                                                                                                                                                                                                                                                                                                                                                                                                                                                                                                                                                                                                                                                                                  |                                              |         |       |        |       |     |            |     |     |     |     |     |            |     |     |     |     |     |              |
| <b>ABSTRAKTION</b>                                                                |         | Gemeinsamkeit von z.B. Banane und Apfelsine = Frucht [ ] Eisenbahn - Fahrrad [ ] Uhr - Lineal                                                                                     |             |          |               |           | ___/2                                                                                                                                                                                                                                                                                                                                                                                                                                                                                                                                                                                                                                                                                                                                                                                                                                                                  |                                              |         |       |        |       |     |            |     |     |     |     |     |            |     |     |     |     |     |              |
| <b>ERINNERUNG</b>                                                                 |         | Wörter erinnern OHNE HINWEIS                                                                                                                                                      | GESICHT [ ] | SAMT [ ] | KIRCHE [ ]    | TULPE [ ] | ROT [ ]                                                                                                                                                                                                                                                                                                                                                                                                                                                                                                                                                                                                                                                                                                                                                                                                                                                                | Punkte nur bei richtigem Nennen OHNE Hinweis | ___/5   |       |        |       |     |            |     |     |     |     |     |            |     |     |     |     |     |              |
| <b>Optional</b>                                                                   |         | Hinweis zu Kategorie                                                                                                                                                              | [ ]         | [ ]      | [ ]           | [ ]       | [ ]                                                                                                                                                                                                                                                                                                                                                                                                                                                                                                                                                                                                                                                                                                                                                                                                                                                                    |                                              |         |       |        |       |     |            |     |     |     |     |     |            |     |     |     |     |     |              |
| <b>Optional</b>                                                                   |         | Mehrfachauswahl                                                                                                                                                                   | [ ]         | [ ]      | [ ]           | [ ]       | [ ]                                                                                                                                                                                                                                                                                                                                                                                                                                                                                                                                                                                                                                                                                                                                                                                                                                                                    |                                              |         |       |        |       |     |            |     |     |     |     |     |            |     |     |     |     |     |              |
| <b>ORIENTIERUNG</b>                                                               |         | [ ] Datum                                                                                                                                                                         | [ ] Monat   | [ ] Jahr | [ ] Wochentag | [ ] Ort   | [ ] Stadt                                                                                                                                                                                                                                                                                                                                                                                                                                                                                                                                                                                                                                                                                                                                                                                                                                                              | ___/6                                        |         |       |        |       |     |            |     |     |     |     |     |            |     |     |     |     |     |              |
| <b>www.mocatest.org</b>                                                           |         | © Z Nasreddine MD Version 7. Nov 2004 deutsche Übersetzung: SM Bartusch, SG Zipper Normal ≥ 26 / 30                                                                               |             |          |               |           | <b>TOTAL</b> ___/30<br>+ 1 Punkt wenn ≤ 12 Jahre Ausbildung                                                                                                                                                                                                                                                                                                                                                                                                                                                                                                                                                                                                                                                                                                                                                                                                            |                                              |         |       |        |       |     |            |     |     |     |     |     |            |     |     |     |     |     |              |
| <b>www.mocatest.org</b>                                                           |         | Untersucher: _____                                                                                                                                                                |             |          |               |           |                                                                                                                                                                                                                                                                                                                                                                                                                                                                                                                                                                                                                                                                                                                                                                                                                                                                        |                                              |         |       |        |       |     |            |     |     |     |     |     |            |     |     |     |     |     |              |

PDQ – 39 (deutsche Version)

Wie oft haben Sie im letzten Monat wegen Ihrer Parkinson-Erkrankung ...

|                                                                                                                        | Niemals                  | Selten                   | Manchmal                 | Häufig                   | Immer<br>oder<br>Kann ich über-<br>haupt nicht |
|------------------------------------------------------------------------------------------------------------------------|--------------------------|--------------------------|--------------------------|--------------------------|------------------------------------------------|
| <i>...Schwierigkeiten gehabt, Freizeitaktivitäten, die Sie gern machen würden, auszuüben ?</i>                         | <input type="checkbox"/>                       |
| <i>...Schwierigkeiten gehabt, Ihren Haushalt zu versorgen (z.B. handwerkliche Tätigkeiten, Hausarbeiten, Kochen) ?</i> | <input type="checkbox"/>                       |
| <i>...Schwierigkeiten gehabt, Einkaufstaschen zu tragen ?</i>                                                          | <input type="checkbox"/>                       |
| <i>...Probleme gehabt, ungefähr 1 km zu gehen ?</i>                                                                    | <input type="checkbox"/>                       |
| <i>...Probleme gehabt, ungefähr 100 m zu gehen ?</i>                                                                   | <input type="checkbox"/>                       |
| <i>...Probleme gehabt, sich im Haus so zu bewegen, wie Sie wollten ?</i>                                               | <input type="checkbox"/>                       |
| <i>...Probleme gehabt, sich in der Öffentlichkeit zu bewegen ?</i>                                                     | <input type="checkbox"/>                       |
| <i>...eine Begleitperson gebraucht, um sich außer Haus zu bewegen ?</i>                                                | <input type="checkbox"/>                       |
| <i>...Angst oder Sorgen gehabt, daß Sie in der Öffentlichkeit hinfallen ?</i>                                          | <input type="checkbox"/>                       |

**Wie oft haben Sie im letzten Monat wegen Ihrer Parkinson-Erkrankung ...**

|                                                                                       | Niemals                  | Selten                   | Manchmal                 | Häufig                   | Immer<br>oder<br>Kann ich über-<br>haupt nicht |
|---------------------------------------------------------------------------------------|--------------------------|--------------------------|--------------------------|--------------------------|------------------------------------------------|
| <i>...das Gefühl gehabt, mehr an das Haus gebunden zu sein, als Ihnen lieb wäre ?</i> | <input type="checkbox"/>                       |
| <i>...Schwierigkeiten gehabt, sich selbst zu waschen ?</i>                            | <input type="checkbox"/>                       |
| <i>...Schwierigkeiten gehabt, sich selbst anzuziehen</i>                              | <input type="checkbox"/>                       |
| <i>...Probleme gehabt, Knöpfe zu schließen oder Schnürsenkel zu binden?</i>           | <input type="checkbox"/>                       |
| <i>...Probleme gehabt, deutlich zu schreiben ?</i>                                    | <input type="checkbox"/>                       |
| <i>...Schwierigkeiten gehabt, Ihr Essen klein zu schneiden ?</i>                      | <input type="checkbox"/>                       |
| <i>...Schwierigkeiten gehabt, ein Getränk zu halten, ohne es zu verschütten ?</i>     | <input type="checkbox"/>                       |
| <i>...sich niedergeschlagen oder deprimiert gefühlt ?</i>                             | <input type="checkbox"/>                       |
| <i>...sich isoliert oder einsam gefühlt ?</i>                                         | <input type="checkbox"/>                       |
| <i>...sich verärgert oder verbittert gefühlt ?</i>                                    | <input type="checkbox"/>                       |
| <i>...sich den Tränen nahe gefühlt ?</i>                                              | <input type="checkbox"/>                       |

**Wie oft haben Sie im letzten Monat wegen Ihrer Parkinson-Erkrankung ...**

|                                                                                                                | Niemals                  | Selten                   | Manchmal                 | Häufig                   | Immer<br>oder<br>Kann ich über-<br>haupt nicht |
|----------------------------------------------------------------------------------------------------------------|--------------------------|--------------------------|--------------------------|--------------------------|------------------------------------------------|
| <i>...sich ängstlich gefühlt ?</i>                                                                             | <input type="checkbox"/>                       |
| <i>...sich Sorgen über Ihre Zukunft gemacht ?</i>                                                              | <input type="checkbox"/>                       |
| <i>...das Gefühl gehabt, Ihre Parkinson-Erkrankung vor anderen verheimlichen zu müssen ?</i>                   | <input type="checkbox"/>                       |
| <i>...Situationen vermieden, die mit dem Essen oder Trinken in der Öffentlichkeit verbunden waren ?</i>        | <input type="checkbox"/>                       |
| <i>...sich in der Öffentlichkeit wegen Ihrer Parkinson-Erkrankung geschämt ?</i>                               | <input type="checkbox"/>                       |
| <i>...sich Sorgen über Reaktionen anderer Ihnen gegenüber gemacht ?</i>                                        | <input type="checkbox"/>                       |
| <i>...Probleme im Verhältnis mit Ihnen nahe stehenden Menschen gehabt ?</i>                                    | <input type="checkbox"/>                       |
| <i>...nicht die Unterstützung erhalten, die Sie von Ihrem (Ehe-)Partner benötigt hätten ?</i>                  | <input type="checkbox"/>                       |
| <i>...nicht die Unterstützung erhalten, die Sie von Ihren Verwandten oder engen Freunden benötigt hätten ?</i> | <input type="checkbox"/>                       |

**Wie oft haben Sie im letzten Monat wegen Ihrer Parkinson-Erkrankung ...**

|                                                                                                    | Niemals                  | Selten                   | Manchmal                 | Häufig                   | Immer<br>oder<br>Kann ich über-<br>haupt nicht |
|----------------------------------------------------------------------------------------------------|--------------------------|--------------------------|--------------------------|--------------------------|------------------------------------------------|
| <i>...das Problem gehabt, tagsüber<br/>unerwartet einzuschlafen ?</i>                              | <input type="checkbox"/>                       |
| <i>...Probleme gehabt, sich zu konzen-<br/>trieren (z.B. beim Lesen oder beim<br/>Fernsehen) ?</i> | <input type="checkbox"/>                       |
| <i>...das Gefühl gehabt, daß Sie ein<br/>schlechtes Gedächtnis hätten ?</i>                        | <input type="checkbox"/>                       |
| <i>...schlechte Träume oder<br/>Halluzinationen gehabt ?</i>                                       | <input type="checkbox"/>                       |
| <i>...Schwierigkeiten mit dem Sprechen<br/>gehabt ?</i>                                            | <input type="checkbox"/>                       |
| <i>...sich außer Stande gefühlt, mit<br/>anderen richtig zu kommunizieren ?</i>                    | <input type="checkbox"/>                       |
| <i>...den Eindruck gehabt, von anderen<br/>nicht beachtet zu werden ?</i>                          | <input type="checkbox"/>                       |
| <i>...schmerzhafte Muskelkrämpfe<br/>gehabt ?</i>                                                  | <input type="checkbox"/>                       |
| <i>...Schmerzen in den Gelenken oder<br/>anderen Körperteilen gehabt ?</i>                         | <input type="checkbox"/>                       |
| <i>...sich unangenehm heiß oder kalt<br/>gefühlt ?</i>                                             | <input type="checkbox"/>                       |



RBDSQ:

Patientenetikette: \_\_\_\_\_

Datum: \_\_\_\_\_

Visite \_\_\_\_\_ Uhrzeit \_\_\_\_\_

**RBDSQ**

|                                                                                                                                 | Ja                       | Nein                     | Zunahme                  | gleich                   | Abnahme                  | Hat sich dies durch die<br>Behandlung verändert? |
|---------------------------------------------------------------------------------------------------------------------------------|--------------------------|--------------------------|--------------------------|--------------------------|--------------------------|--------------------------------------------------|
| 1. Ich habe teilweise sehr lebhaftere Träume                                                                                    | <input type="checkbox"/>                         |
| 2. Meine Träume haben des öfteren aggressiven oder aktionsgeladenen Inhalt                                                      | <input type="checkbox"/>                         |
| 3. Die Traumhalte stimmen meist mit meinem nächtlichen Verhalten überein                                                        | <input type="checkbox"/>                         |
| 4. Mir ist bekannt, dass ich meine Arme oder Beine im Schlaf bewege                                                             | <input type="checkbox"/>                         |
| 5. Es ist dabei vorgekommen, dass ich meinen Partner oder mich selbst (beinahe) verletzt habe                                   | <input type="checkbox"/>                         |
| 6. Bei mir treten oder traten während des Träumens folgende Erscheinungen auf:                                                  |                          |                          |                          |                          |                          |                                                  |
| 6.1. Laut Sprechen, Schreien, Schimpfen, Lachen                                                                                 | <input type="checkbox"/>                         |
| 6.2. Plötzliche Bewegungen der Gliedmassen ... Kämpfen                                                                          | <input type="checkbox"/>                         |
| 6.3. Gesten, Bewegungsabläufe, die im Schlaf sinnlos sind wie z.B. winken, salutieren, Mücken verscheuchen, Stürze aus dem Bett | <input type="checkbox"/>                         |
| 6.4. Um das Bett herum umgefallene Gegenstände wie z.B. Nachttischlampe, Buch, Brille                                           | <input type="checkbox"/>                         |
| 7. Es kommt vor, dass ich durch meine eigenen Bewegungen wach werde                                                             | <input type="checkbox"/>                         |
| 8. Nach dem Erwachen kann ich mich an den Inhalt meiner Träume meist gut erinnern                                               | <input type="checkbox"/>                         |
| 9. Mein Schlaf ist häufiger gestört                                                                                             | <input type="checkbox"/>                         |

Version 1.0, 17.04.2013

## QUIP-RS:

### Kurzanweisung

Bitte lesen Sie die Kurzanweisung vor dem Ausfüllen des Fragebogens!  
Sie finden hier Informationen zum relevanten Zeitrahmen, Erklärungen zu den im Fragebogen vorkommenden Verhaltensweisen sowie Erläuterungen zu den Häufigkeiten der Symptome.

### ZEITRAHMEN

Beziehen Sie sich bei der Beantwortung der Fragen bitte auf die letzten vier Wochen.

### BESCHREIBUNG DER VERHALTENSWEISEN

**A. Glücksspiel** (Casinos, Internet-Glücksspiele, Lotto, Rubbellose, Wetten, Spielautomaten oder Pokerautomaten)

**B. Sex** (unangemessene sexuelle Forderungen an andere stellen, wechselnde Sexualpartner, Prostitution, Veränderung der sexuellen Orientierung, Selbstbefriedigung, Internet-, Telefonsex oder Pornografie)

**C. Kaufen** (zu viel von einer Sache bzw. Dinge kaufen, die Sie nicht benötigen oder verwenden)

**D. Essen** (Essen von größeren Mengen oder anderen Nahrungsmitteln als früher, schneller als normal, zu anderen Zeiten (beispielsweise mitten in der Nacht), essen bis Sie sich unangenehm voll fühlen oder obwohl Sie gar nicht hungrig sind)

**E. Hobbyismus** (bestimmte Aufgaben, Hobbys oder andere geplante Tätigkeiten, wie z.B. Schreiben, Malen, Gartenarbeit, das Reparieren oder Montieren von Dingen, Computerbenutzung, Projektarbeit etc.)

**F. Punding** (Wiederholen von einfachen motorischen Tätigkeiten, wie z.B. Putzen, Aufräumen, Hantieren, Untersuchen, Sortieren, Sammeln, Ordnen oder Anordnen von Dingen etc.)

**G. Medikamentengebrauch** (immer wieder zu viel von den Parkinson-Medikamenten nehmen oder selbstständiges Erhöhen der Einnahme Ihrer Parkinson-Medikamente, ohne ärztliches Anraten)

### HÄUFIGKEIT DER SYMPTOME

|              |                                                   |
|--------------|---------------------------------------------------|
| Nie (0)      | = überhaupt nicht                                 |
| Selten (1)   | = kaum <u>bzw.</u> an einem Tag pro Woche         |
| Manchmal (2) | = gelegentlich <u>bzw.</u> an 2-3 Tagen pro Woche |
| Oft (3)      | = meistens <u>bzw.</u> an 4-5 Tagen pro Woche     |
| Sehr oft (4) | = fast immer <u>bzw.</u> an 6-7 Tagen pro Woche   |

QUIP-RATING SCALE  
Version 1.0 (7/01/09)  
Copyright © University of Pennsylvania 2009

1

Patient / Proband: \_\_\_\_\_  
 Datum: \_\_\_\_\_

**1. Wie oft denken Sie über die folgenden Verhaltensweisen nach (Haben Sie bspw. Schwierigkeiten, die Gedanken darüber aus dem Kopf zu bekommen oder haben Sie Schuldgefühle)?**

|                                              |        |           |             |        |             |
|----------------------------------------------|--------|-----------|-------------|--------|-------------|
| A. Glücksspiele?                             | Nie(0) | Selten(1) | Manchmal(2) | Oft(3) | Sehr oft(4) |
| B. Sex?                                      | Nie(0) | Selten(1) | Manchmal(2) | Oft(3) | Sehr oft(4) |
| C. Kaufen?                                   | Nie(0) | Selten(1) | Manchmal(2) | Oft(3) | Sehr oft(4) |
| D. Essen?                                    | Nie(0) | Selten(1) | Manchmal(2) | Oft(3) | Sehr oft(4) |
| E. Aufgaben durchführen / Hobbies nachgehen? | Nie(0) | Selten(1) | Manchmal(2) | Oft(3) | Sehr oft(4) |
| F. Einfache Aktivitäten wiederholen?         | Nie(0) | Selten(1) | Manchmal(2) | Oft(3) | Sehr oft(4) |
| G. Ihre Parkinson-Medikamente nehmen?        | Nie(0) | Selten(1) | Manchmal(2) | Oft(3) | Sehr oft(4) |

**2. Haben Sie einen Drang nach den folgenden Verhaltensweisen, den Sie für zu exzessiv halten oder unter dem Sie leiden? Verspüren Sie bspw. Ruhelosigkeit oder Reizbarkeit, wenn Sie die Verhaltensweisen nicht durchführen können?**

|                                              |        |           |             |        |             |
|----------------------------------------------|--------|-----------|-------------|--------|-------------|
| A. Glücksspiele?                             | Nie(0) | Selten(1) | Manchmal(2) | Oft(3) | Sehr oft(4) |
| B. Sex?                                      | Nie(0) | Selten(1) | Manchmal(2) | Oft(3) | Sehr oft(4) |
| C. Kaufen?                                   | Nie(0) | Selten(1) | Manchmal(2) | Oft(3) | Sehr oft(4) |
| D. Essen?                                    | Nie(0) | Selten(1) | Manchmal(2) | Oft(3) | Sehr oft(4) |
| E. Aufgaben durchführen / Hobbies nachgehen? | Nie(0) | Selten(1) | Manchmal(2) | Oft(3) | Sehr oft(4) |
| F. Einfache Aktivitäten wiederholen?         | Nie(0) | Selten(1) | Manchmal(2) | Oft(3) | Sehr oft(4) |
| G. Ihre Parkinson-Medikamente nehmen?        | Nie(0) | Selten(1) | Manchmal(2) | Oft(3) | Sehr oft(4) |

**3. Haben Sie Schwierigkeiten, die folgenden Verhaltensweisen zu kontrollieren (nehmen diese z.B. über die Zeit hinweg zu oder haben Sie Schwierigkeiten sie einzuschränken oder einzustellen)?**

|                                              |        |           |             |        |             |
|----------------------------------------------|--------|-----------|-------------|--------|-------------|
| A. Glücksspiele?                             | Nie(0) | Selten(1) | Manchmal(2) | Oft(3) | Sehr oft(4) |
| B. Sex?                                      | Nie(0) | Selten(1) | Manchmal(2) | Oft(3) | Sehr oft(4) |
| C. Kaufen?                                   | Nie(0) | Selten(1) | Manchmal(2) | Oft(3) | Sehr oft(4) |
| D. Essen?                                    | Nie(0) | Selten(1) | Manchmal(2) | Oft(3) | Sehr oft(4) |
| E. Aufgaben durchführen / Hobbies nachgehen? | Nie(0) | Selten(1) | Manchmal(2) | Oft(3) | Sehr oft(4) |
| F. Einfache Aktivitäten wiederholen?         | Nie(0) | Selten(1) | Manchmal(2) | Oft(3) | Sehr oft(4) |
| G. Ihre Parkinson-Medikamente nehmen?        | Nie(0) | Selten(1) | Manchmal(2) | Oft(3) | Sehr oft(4) |

**4. Unternehmen Sie bestimmte Tätigkeiten (wie z.B. verbergen, was Sie tun, lügen, Dinge horten, von anderen etwas ausleihen, Schulden anhäufen, stehlen oder sich an illegalen Handlungen beteiligen), nur um die folgenden Verhaltensweisen fortsetzen zu können?**

|                                              |        |           |             |        |             |
|----------------------------------------------|--------|-----------|-------------|--------|-------------|
| A. Glücksspiele?                             | Nie(0) | Selten(1) | Manchmal(2) | Oft(3) | Sehr oft(4) |
| B. Sex?                                      | Nie(0) | Selten(1) | Manchmal(2) | Oft(3) | Sehr oft(4) |
| C. Kaufen?                                   | Nie(0) | Selten(1) | Manchmal(2) | Oft(3) | Sehr oft(4) |
| D. Essen?                                    | Nie(0) | Selten(1) | Manchmal(2) | Oft(3) | Sehr oft(4) |
| E. Aufgaben durchführen / Hobbies nachgehen? | Nie(0) | Selten(1) | Manchmal(2) | Oft(3) | Sehr oft(4) |
| F. Einfache Aktivitäten wiederholen?         | Nie(0) | Selten(1) | Manchmal(2) | Oft(3) | Sehr oft(4) |
| G. Ihre Parkinson-Medikamente nehmen?        | Nie(0) | Selten(1) | Manchmal(2) | Oft(3) | Sehr oft(4) |

Proband: \_\_\_\_\_  
Datum: \_\_\_\_\_

AUSWERTUNG

|                         |       |        |
|-------------------------|-------|--------|
| A. Glücksspiel          | _____ | (0-16) |
| B. Sex                  | _____ | (0-16) |
| C. Kaufen               | _____ | (0-16) |
| D. Essen                | _____ | (0-16) |
| E. Hobbyismus           | _____ | (0-16) |
| F. Punding              | _____ | (0-16) |
| G. Medikamentengebrauch | _____ | (0-16) |

IKS Gesamtwert (A-D) \_\_\_\_\_ (0-64)

QUIP-RS Gesamtwert (A-G) \_\_\_\_\_ (0-112)

## ZBCI:

für Partnerin / Partner bzw. Pflegende / Pflegenden von (Patientenetikette):

Visite: Datum:

### Zarit Burden of Caregiver Interview (ZBCI)

Deutsche Version gemäss Braun M. et al. *Z Gerontol Geriatr.* 2010 Apr;43(2)

Folgender Fragebogen bezieht sich auf die letzten beiden Wochen. Durch Ankreuzen der Antwortmöglichkeiten nach jeder Frage können Sie beantworten, ob die getroffene Aussage 0 = nie, 1 = selten, 2 = manchmal, 3 = oft, 4 = fast immer zutrifft. Bitte beantworten sie jede Frage, falls eine Frage nicht zutrifft bitte die Spalte „nie“ ankreuzen.

|                                                                                                                                                                       | Nie                   | selten                | manchmal              | oft                   | fast immer            |
|-----------------------------------------------------------------------------------------------------------------------------------------------------------------------|-----------------------|-----------------------|-----------------------|-----------------------|-----------------------|
| 1. Glauben Sie, dass Ihr Partner/Patient um mehr Hilfe bittet als er braucht?                                                                                         | <input type="radio"/> |
| 2. Sind Sie der Meinung, dass Sie durch die Zeit, die Sie mit Ihrem Partner/Patient verbringen, nicht ausreichend Zeit für sich selbst haben?                         | <input type="radio"/> |
| 3. Fühlen Sie sich überfordert bei Ihrem Versuch, neben der Pflege Ihres Partners/Patienten, Ihren anderen Verpflichtungen gegenüber Familie oder Beruf nachzukommen? | <input type="radio"/> |
| 4. Bringt Sie das Verhalten Ihres Partners/Patienten in Verlegenheit?                                                                                                 | <input type="radio"/> |
| 5. Sind Sie wütend, wenn Sie bei Ihrem Partner/Patienten sind?                                                                                                        | <input type="radio"/> |
| 6. Glauben Sie, dass Ihr Partner/Patient zur Zeit Ihre Beziehungen mit anderen Familienmitgliedern oder Freunden negativ beeinflusst?                                 | <input type="radio"/> |
| 7. Haben Sie Angst, was die Zukunft für Ihren Partner/Patienten bringt?                                                                                               | <input type="radio"/> |
| 8. Glauben Sie, dass Ihr Partner/Patient von Ihnen abhängig ist?                                                                                                      | <input type="radio"/> |
| 9. Fühlen Sie sich angespannt, wenn Sie bei Ihrem Partner/Patient sind?                                                                                               | <input type="radio"/> |
| 10. Glauben Sie, dass Ihre eigene Gesundheit unter Ihrem Engagement in der Pflege Ihres Partners/Patienten leidet, bzw. gelitten hat?                                 | <input type="radio"/> |
| 11. Haben Sie das Gefühl, dass Sie wegen Ihres Partners/Patienten weniger Privatsphäre oder Raum für sich alleine haben als Sie es gerne hätten?                      | <input type="radio"/> |
| 12. Sind Sie der Meinung, dass Ihr Sozialleben unter der Pflege Ihres Partners/Patienten leidet, bzw. gelitten hat?                                                   | <input type="radio"/> |
| 13. Ist es Ihnen wegen Ihres Partner/Patienten unangenehm, Freunde zu Besuch zu haben?                                                                                | <input type="radio"/> |
| 14. Glauben Sie, dass Ihr Partner/Patient von Ihnen erwartet, dass Sie ihn pflegen, als wären Sie die einzige Person, von der er abhängen könnte?                     | <input type="radio"/> |
| 15. Sind Sie der Meinung, dass Sie nicht genug Geld für die Pflege Ihres Partner/Patienten zusätzlich zu Ihren restlichen Ausgaben haben?                             | <input type="radio"/> |
| 16. Glauben Sie, dass Sie außerstande sein werden, Ihren Partner/Patienten viel länger zu pflegen?                                                                    | <input type="radio"/> |

Seite 1 von 2

Version 1.0, 26.02.2013

|                                                                                                                              | Nie                   | selten                | manchmal              | oft                   | fast immer            |
|------------------------------------------------------------------------------------------------------------------------------|-----------------------|-----------------------|-----------------------|-----------------------|-----------------------|
| 17. Glauben Sie, seit der Krankheit Ihres Partners/<br>Patienten, die Kontrolle über Ihr eigenes Leben<br>verloren zu haben? | <input type="radio"/> |
| 18. Wünschen Sie sich, die Pflege Ihres Partner/<br>Patienten jemand anderen überlassen zu<br>können?                        | <input type="radio"/> |
| 19. Sind Sie unsicher, was Sie im Fall Ihres Partners/<br>Patienten unternehmen sollten?                                     | <input type="radio"/> |
| 20. Glauben Sie, Sie sollten mehr für Ihren Partner/<br>Patienten tun?                                                       | <input type="radio"/> |
| 21. Sind Sie der Meinung, dass Sie die Pflege Ihres<br>Partner/Patienten besser machen könnten?                              | <input type="radio"/> |
| 22. Wie stark fühlen Sie sich insgesamt durch die<br>Pflege Ihres Partners/Patienten belastet?                               | <input type="radio"/> |
| Zarit Gesamtwert:                                                                                                            |                       |                       |                       |                       | ...../88 Punkten      |
| 23. Wachen Sie aufgrund des Schlafverhaltens ihres<br>Partners/Patienten nachts auf?                                         | <input type="radio"/> |
| 24. Leidet Ihr eigener Schlaf unter dem Verhalten ihres<br>Partners/Patienten?                                               | <input type="radio"/> |
| 25. Kommt es vor dass ihr Partner/Patient von<br>nächtlichen Träumen berichtet?                                              | <input type="radio"/> |
| 26. Kommt es vor, dass ihr Partner/Patient nachts<br>spricht, ruft oder um sich schlägt?                                     | <input type="radio"/> |
| Parasomnie Gesamtwert:                                                                                                       |                       |                       |                       |                       | ...../16 Punkten      |

## UPDRS II:

Patientenetikette:

Datum: \_\_\_\_\_

Visite \_\_\_\_\_ Uhrzeit \_\_\_\_\_

ON  OFF

UPDRS II. Aktivitäten des täglichen Lebens  
(jeweils getrennt in on/off-Perioden ermitteln)

### 5. Sprache:

- 0 – Normal
- 1 - Leicht beeinträchtigt. Keine Verständigungsschwierigkeiten.
- 2 - Mäßig beeinträchtigt. Wird bisweilen gebeten, etwas zu wiederholen.
- 3 - Stark beeinträchtigt. Wird häufig gebeten, etwas zu wiederholen.
- 4 - Meistens unverständlich

### 6. Speichelsekretion:

- 0 - Normal
- 1 - Gering, aber eindeutig vermehrter Speichel im Mund; nachts gelegentlich Speichelaustritt.
- 2 - Mäßig vermehrte Speichelsekretion; eventuell minimaler Speichelaustritt.
- 3 - Deutlich vermehrte Speichelsekretion mit leichtem Speichelaustritt
- 4 - Ausgeprägter Speichelaustritt, muß ständig Papiertuch oder Taschentuch benutzen.

### 7. Schlucken:

- 0 - Normal.
- 1 - Leicht beeinträchtigt. Keine Verständigungsschwierigkeiten.
- 2 - Mäßig beeinträchtigt. Wird bisweilen gebeten, etwas zu wiederholen.
- 3 - Stark beeinträchtigt. Wird häufig gebeten, etwas zu wiederholen.
- 4 - Meistens unverständlich.

### 8. Handschrift:

- 0 - Normal.
- 1 - Etwas langsam oder klein.
- 2 - Mäßig langsam oder klein; sämtliche Wörter leserlich.
- 3 - Stark beeinträchtigt; nicht alle Wörter leserlich.
- 4 - Die Mehrzahl der Wörter ist unleserlich.

### 9. Speisen schneiden und mit Utensilien umgehen:

- 0 - Normal.
- 1 - Etwas langsam und unbeholfen, aber keine Hilfe erforderlich.
- 2 - Kann die meisten Speisen schneiden, jedoch unbeholfen und langsam; etwas Hilfe erforderlich.
- 3 - Speisen müssen von jemandem geschnitten werden, kann aber noch langsam essen.
- 4 - Muß gefüttert werden.

### 10. Anziehen:

- 0 - Normal.
- 1 - Etwas langsam, aber keine Hilfe erforderlich.
- 2 - Gelegentliche Hilfe beim Knöpfen, beim Schlüpfen in die Ärmel.
- 3 - Beträchtliche Hilfe erforderlich, kann aber manches alleine schaffen.
- 4 - Hilfslos.

### 11. Hygiene:

- 0 - Normal.
- 1 - Etwas langsam, aber keine Hilfe erforderlich
- 2 - Braucht beim Duschen und Baden Hilfe; oder bei Körperpflege sehr langsam.
- 3 - Braucht beim Waschen, Zähnebürsten, Haarekämmen und beim Gang auf die Toilette Hilfe.
- 4 - Foley-Katheter oder andere mechanische Hilfsmittel

Version 1.2, 15.02.2013

Seite 1 von 2

12. Umdrehen im Bett und Bettwäsche zurechtziehen:

- 0 - Normal.
- 1 - Etwas langsam und unbeholfen, benötigt aber keine Hilfe
- 2 - Kann sich alleine, jedoch unter großen Schwierigkeiten, herumdrehen und die Bettwäsche zurechtziehen.
- 3 - Beginnt, kann sich aber nicht alleine im Bett umdrehen oder die Bettwäsche zurechtziehen.
- 4 - Hilfslos

13. Fallen (unabhängig von Starre)

- 0 - Kein.
- 1 - Seltenes Fallen.
- 2 - Gelegentliches Fallen, weniger als einmal pro Tag.
- 3 - Fällt durchschnittlich einmal pro Tag.
- 4 - Fällt häufiger als einmal pro Tag.

14. Erstarren beim Gehen:

- 0 - Kein.
- 1 - Seltenes Erstarren beim Gehen; eventuell verzögerter Start.
- 2 - Gelegentliches Erstarren beim Gehen.
- 3 - Regelmäßiges Erstarren. Gelegentliches Fallen nach Erstarren.
- 4 - Häufiges Fallen nach Erstarren.

15. Laufen:

- 0 - Normal
- 1 - Leichte Schwierigkeiten. Eventuell fehlendes Mitschwingen der Arme eventuell Neigung das Bein nachzuziehen
- 2 - Mäßige Schwierigkeiten, benötigt jedoch wenig oder keine Hilfe.
- 3 - Schwere Gehstörung, benötigt Hilfe.
- 4 - Kann selbst mit Hilfe nicht mehr gehen

16. Tremor

- 0 - Keiner.
- 1 - Leicht und selten auftretend
- 2 - Mäßig; für den Patienten lästig
- 3 - Stark, bei zahlreichen Aktivitäten hinderlich
- 4 - Ausgeprägt; bei den meisten Aktivitäten hinderlich

17. Sensorische Beschwerden infolge von Parkinsonismus:

- 0 - Keine.
- 1 - Gelegentliches Taubheitsgefühl, Kribbeln oder leichte Schmerzen
- 2 - Häufiges Taubheitsgefühl, Kribbeln oder Schmerzen, nicht störend.
- 3 - Häufig schmerzhaft empfindungen
- 4 - Unerträgliche Schmerzen

TOTAL PUNKTE: \_\_\_\_\_ IN      ON       OFF



|        |                    |              |               |
|--------|--------------------|--------------|---------------|
| PDSS-2 | Patientenetikette: | Datum: _____ | Visite: _____ |
|--------|--------------------|--------------|---------------|

Bitte beantworten Sie die folgenden Fragen in bezug auf Ihre Erfahrungen in der letzten Woche (7 Tage). Markieren Sie das entsprechende Kästchen bei der zutreffenden Antwort.

|                                                                                                                        | Sehr oft<br>(D.h. 6 bis 7<br>Tage pro Woche) | Oft<br>(D.h. 4 bis 5<br>Tage pro Woche) | Manchmal<br>(D.h. 2 bis 3<br>Tage pro Woche) | Selten<br>(D.h. 1 Tag<br>pro Woche) | Nie                      |
|------------------------------------------------------------------------------------------------------------------------|----------------------------------------------|-----------------------------------------|----------------------------------------------|-------------------------------------|--------------------------|
| 1 Haben Sie in der letzten Woche im Allgemeinen gut geschlafen?                                                        | <input type="checkbox"/>                     | <input type="checkbox"/>                | <input type="checkbox"/>                     | <input type="checkbox"/>            | <input type="checkbox"/> |
| 2 Hatten Sie nachts Probleme beim Einschlafen?                                                                         | <input type="checkbox"/>                     | <input type="checkbox"/>                | <input type="checkbox"/>                     | <input type="checkbox"/>            | <input type="checkbox"/> |
| 3 Hatten Sie Durchschlafstörungen?                                                                                     | <input type="checkbox"/>                     | <input type="checkbox"/>                | <input type="checkbox"/>                     | <input type="checkbox"/>            | <input type="checkbox"/> |
| 4 Spürten Sie in Ihren Beinen oder Armen nachts einen Bewegungsdrang, der Ihren Schlaf störte?                         | <input type="checkbox"/>                     | <input type="checkbox"/>                | <input type="checkbox"/>                     | <input type="checkbox"/>            | <input type="checkbox"/> |
| 5 War Ihr Schlaf durch einen Drang die Beine oder Arme zu bewegen gestört?                                             | <input type="checkbox"/>                     | <input type="checkbox"/>                | <input type="checkbox"/>                     | <input type="checkbox"/>            | <input type="checkbox"/> |
| 6 Hatten Sie nachts Träume, die Ihnen zu schaffen machten (Alpträume)?                                                 | <input type="checkbox"/>                     | <input type="checkbox"/>                | <input type="checkbox"/>                     | <input type="checkbox"/>            | <input type="checkbox"/> |
| 7 Hatten Sie nachts Halluzinationen, die Sie beeinträchtigen?<br>(Sehen oder hören Sie Dinge, die es nicht gibt?)      | <input type="checkbox"/>                     | <input type="checkbox"/>                | <input type="checkbox"/>                     | <input type="checkbox"/>            | <input type="checkbox"/> |
| 8 Standen Sie nachts auf, um Wasser zu lassen?                                                                         | <input type="checkbox"/>                     | <input type="checkbox"/>                | <input type="checkbox"/>                     | <input type="checkbox"/>            | <input type="checkbox"/> |
| 9 Haben Sie sich nachts unwohl gefühlt, weil Sie sich im Bett nicht drehen oder bewegen konnten wegen Unbeweglichkeit? | <input type="checkbox"/>                     | <input type="checkbox"/>                | <input type="checkbox"/>                     | <input type="checkbox"/>            | <input type="checkbox"/> |
| 10 Hatten Sie Schmerzen in den Armen oder Beinen, die Sie nachts aufweckten?                                           | <input type="checkbox"/>                     | <input type="checkbox"/>                | <input type="checkbox"/>                     | <input type="checkbox"/>            | <input type="checkbox"/> |
| 11 Hatten Sie schmerzhaft Muskelkrämpfe in Armen oder Beinen, welche Sie weckten als Sie nachts schliefen?             | <input type="checkbox"/>                     | <input type="checkbox"/>                | <input type="checkbox"/>                     | <input type="checkbox"/>            | <input type="checkbox"/> |

|                                                                                          | Sehr oft<br>(D.h. 6 bis 7<br>Tage pro Woche) | Oft<br>(D.h. 4 bis 5<br>Tage pro Woche) | Manchmal<br>(D.h. 2 bis 3<br>Tage pro Woche) | Selten<br>(D.h. 1 Tag<br>pro Woche) | Nie                      |
|------------------------------------------------------------------------------------------|----------------------------------------------|-----------------------------------------|----------------------------------------------|-------------------------------------|--------------------------|
| 12 Wachten Sie früh am Morgen auf mit schmerzhafter Positionierung der Arme und Beine?   | <input type="checkbox"/>                     | <input type="checkbox"/>                | <input type="checkbox"/>                     | <input type="checkbox"/>            | <input type="checkbox"/> |
| 13 Zitterten Sie, wenn Sie aufwachten?                                                   | <input type="checkbox"/>                     | <input type="checkbox"/>                | <input type="checkbox"/>                     | <input type="checkbox"/>            | <input type="checkbox"/> |
| 14 Fühlten Sie sich morgens nach dem Aufwachen müde und schläfrig?                       | <input type="checkbox"/>                     | <input type="checkbox"/>                | <input type="checkbox"/>                     | <input type="checkbox"/>            | <input type="checkbox"/> |
| 15 Sind Sie nachts aufgewacht, weil Sie geschmarrt haben oder Mühe mit dem Atmen hatten? | <input type="checkbox"/>                     | <input type="checkbox"/>                | <input type="checkbox"/>                     | <input type="checkbox"/>            | <input type="checkbox"/> |

Zusatzfrage bei Visite 4 & Visite 8:

Hatten Sie das Gefühl, dass sich das Ausagieren der Träume während der Behandlung verändert hat?

- Mehr als sonst
- Weniger als sonst
- Gleich wie sonst
- Keine Aussage möglich

Medikationstagebuch:

Medikationstagebuch - Terminliste

Patientenetikette:

Patientennummer:

| Woche | Termin          | Datum | Uhrzeit | Studienmedikation in Gramm pro Einnahme |
|-------|-----------------|-------|---------|-----------------------------------------|
| 1     | Telefongespräch |       |         | 1.5g                                    |
| 2     | Kontroll-Visite |       |         |                                         |
| 3     | Telefongespräch |       |         |                                         |
| 4     | Kontroll-Visite |       |         |                                         |
| 5     | Telefongespräch |       |         |                                         |
| 6     | Untersuchung    |       |         | Rest mitbringen!                        |
| 7     | Untersuchung    |       |         | keine Studienmedikamente                |
| 8     | Telefongespräch |       |         | 1.5g                                    |
| 9     | Kontroll-Visite |       |         |                                         |
| 10    | Telefongespräch |       |         |                                         |
| 11    | Kontroll-Visite |       |         |                                         |
| 12    | Telefongespräch |       |         |                                         |
| 13    | Untersuchung    |       |         | Rest mitbringen!                        |

**Bitte bringen Sie das Medikationstagebuch und restliche Studienmedikation bei jeder Visite mit!**

On every visit for the next 2 weeks:

| Patientennummer: |                    | Patientenetikette: |             |  |
|------------------|--------------------|--------------------|-------------|--|
| Woche 1 & 2      |                    |                    |             |  |
| Datum            | Medikation pro Tag | 1. Einnahme        | 2. Einnahme |  |
|                  | 2x 1.5g            |                    |             |  |
|                  | 2x                 |                    |             |  |

## Written patient instructions:

### **Anleitung zur Studienmedikationseinnahme für Patienten**

#### Wie verwenden Sie das Studienmedikament?

Nehmen Sie das Studienmedikament immer genau nach Anweisung des Studienarztes. Bitte fragen Sie bei Ihrem Studienarzt nach, wenn Sie sich nicht ganz sicher sind.

Sie müssen das Studienmedikament an jedem Abend zweimal einnehmen. Nehmen Sie die erste Dosis ein, wenn Sie zu Bett gehen und die zweite Dosis 2,5 bis 4 Stunden später. Sie müssen sich eventuell einen Wecker stellen, um sicher zu sein, dass Sie aufwachen, um die zweite Dosis einzunehmen.

Durch Nahrung wird die von Ihrem Körper aufgenommene Menge an Xyrem verringert. Deshalb ist es am besten, wenn Sie das Studienmedikament in einem Zeitabstand von ca. 2 Stunden nach einer Mahlzeit einnehmen. Bereiten Sie beide Dosen in den dafür vorgesehenen Dosierbechern vor der Schlafenszeit vor. Der zeitliche Abstand zwischen Einnahme der Mahlzeit und der ersten Arzneimitteleinnahme sollte möglichst immer gleich sein.

#### Anweisungen zum Verdünnen der Studienmedikation

Die folgenden Anweisungen erklären, wie Sie die Studienmedikation für die Einnahme vorbereiten.

**Bitte lesen Sie die Anweisungen sorgfältig durch und befolgen Sie sie Schritt für Schritt.**

Um Ihnen die Zubereitung zu erleichtern, enthält jede Packung der Studienmedikation nebst 1 Flasche der Studienmedikation eine Messspritze und zwei Dosierbecher mit kindersicheren Verschlusskappen.

1. Die Flasche ist mit einer kindersicheren Verschlusskappe verschlossen.

Entfernen Sie die Verschlusskappe von der Flasche, indem Sie diese nach unten drücken und gleichzeitig gegen den Uhrzeigersinn (d.h. nach links) drehen. Nach dem Entfernen der Verschlusskappe stellen Sie die Flasche aufrecht auf einen Tisch.

Auf dem Flaschenhals befindet sich eine Folienversiegelung aus Kunststoff, die vor dem ersten Öffnen der Flasche entfernt werden muss.

Halten Sie die Flasche aufrecht und setzen Sie den Flaschenadapter zum Eindrücken in den Flaschenhals ein. Dies müssen Sie nur beim ersten Öffnen der Flasche tun. Der Adapter kann danach zur weiteren Verwendung in der Flasche bleiben.

2. Dann setzen Sie die Spitze der Messspritze in die Mitte der Flaschenöffnung ein und drücken Sie sie fest nach unten.

3. Halten Sie die Flasche und die Spritze mit einer Hand fest und ziehen Sie mit der anderen Hand die vorgeschriebene Dosis auf, indem Sie den Kolben der Spritze nach oben ziehen.

*Hinweis:* Das Arzneimittel fliesst nur dann in die Spritze, wenn Sie die Flasche aufrecht halten.

4. Ziehen Sie die Spritze aus der Flaschenöffnung heraus. Entleeren Sie das Arzneimittel aus der Spritze in einen der mitgelieferten Dosierbecher, indem Sie auf den Kolben der Spritze drücken. Wiederholen Sie diese Schritte für den zweiten Dosierbecher. Geben Sie anschliessend etwa 60 ml Wasser in jeden Dosierbecher (60 ml sind etwa 4 Esslöffel).

5. Setzen Sie die mitgelieferten Verschlusskappen auf die Dosierbecher und drehen Sie jede Verschlusskappe im Uhrzeigersinn (d.h. nach rechts), bis sie hörbar einrastet und kindersicher verschlossen ist. Spülen Sie die Spritze mit Wasser aus.

6. Unmittelbar vor dem Schlafengehen stellen Sie die 2 Dosen neben Ihr Bett. Möglicherweise müssen Sie einen Wecker stellen, damit Sie aufwachen, um Ihre zweite Dosis einzunehmen. Dies darf nicht früher als 2,5 Stunden und nicht später als 4 Stunden nach Einnahme der ersten Dosis geschehen.

7. Entfernen Sie die Verschlusskappe von dem ersten Dosierbecher, indem Sie den kindersicheren Verschluss nach unten drücken und die Verschlusskappe gegen den Uhrzeigersinn (d.h. nach links) drehen. Trinken Sie die ganze erste Dosis, während Sie im Bett sitzen, verschliessen Sie den Dosierbecher wieder, und legen Sie sich dann sofort hin.

8. Wenn Sie 2,5 bis 4 Stunden später aufwachen, entfernen Sie die Verschlusskappe von dem zweiten Dosierbecher. Trinken Sie die ganze zweite Dosis, während Sie im Bett sitzen. Verschliessen Sie den zweiten Becher wieder, und legen Sie sich dann sofort wieder hin, um weiterzuschlafen.

*Wenn Sie eine grössere Menge des Studienmedikaments eingenommen haben, als Sie sollten:*

Zu den Symptomen einer Überdosis von Xyrem können Erregung, Verwirrung, Bewegungsstörungen, Kopfschmerzen, Erbrechen, Beeinträchtigung der Atmung, verschwommenes Sehen, starkes Schwitzen und ein vermindertes Bewusstsein bis hin zum Koma und Anfall gehören. Wenn Sie mehr Studienmedikation genommen haben, als Sie sollten, oder sie versehentlich eingenommen haben, wenden Sie sich unverzüglich an den medizinischen Notfalldienst. Nehmen Sie die beschriftete Arzneimittelflasche mit, auch wenn sie leer ist.

*Wenn Sie die Einnahme des Studienmedikaments vergessen haben:*

Wenn Sie die Einnahme der ersten Dosis vergessen haben, nehmen Sie sie ein, sobald es Ihnen wieder einfällt, und setzen Sie die Einnahme der zweiten Dosis nach 2,5 bis 4 Stunden fort. Wenn Sie die zweite Dosis vergessen haben, überspringen Sie diese Dosis, und nehmen Sie die Studienmedikation erst wieder am nächsten Abend ein.

**Nehmen Sie nicht die doppelte Dosis ein, um vergessene Einzeldosen wieder auszugleichen.**

Notieren Sie jeweils die Uhrzeit der Einnahmen in Ihrem Medikationstagebuch. Sollten Sie einmal eine Einnahme vergessen haben, markieren Sie dies mit einem X im Feld für die Uhrzeit der Einnahme.

**Arzneimittel für Kinder unzugänglich aufbewahren.**

**Bei Raumtemperatur (15–25 °C) aufbewahren.**

**Mit Wasser verdünnte Lösungen dürfen nicht länger als 24 Stunden aufbewahrt werden.**

Sleep Questionnaire:

Schlaflabor/Schlafsprechstunde  
Laboratoire du Sommeil/Consultation des maladies du sommeil

Schlaf-Apnoe-Syndrom, Hypersomnien, Narkolepsie, Parasomnien, Insomnien, Schlaf-Wach-Rhythmusstörungen  
Syndromes d'apnée du sommeil, hypersomnies, narcolepsie, parasomnies, insomnies, troubles du rythme circadien

Prof. Dr. med. M. Weller  
Klinikdirektor

UniversitätsSpital Zürich  
Klinik für Neurologie  
Frauenklinikstrasse 26  
CH-8091 Zürich  
www.neurologie.usz.ch

## Schlaf-Fragebogen

Bas 14, Januar 1997, rev: CST 1, Februar 2001, MB, rev: EW Oktober 2001, rev: CH/UK/EW/Bes Januar 2005

Damit wir uns von Ihnen und Ihren Schlafproblemen ein möglichst umfassendes Bild machen können, bitten wir Sie, den beiliegenden Schlaffragebogen **genau und vollständig** auszufüllen. Dieser Fragebogen wird **streng vertraulich** behandelt.

Abteilung für Schlafmedizin  
PD Dr. C. Baumann, Leiter  
Dr. E. Werth, Somnologin

Schlafsprechstunde  
Tel. 044 255 55 03  
Fax 044 255 92 01  
Schlaflabor  
Tel. 044 255 55 75  
Fax 044 255 88 64

Bitte beantworten Sie jede Frage eindeutig (nur eine Wahl). Wenn Sie sich nicht ganz sicher sind, welche Antwort auf Sie zutrifft, schätzen Sie bitte und markieren Sie das entsprechende Feld.  
Viele Fragen beginnen mit "Wie oft ...?". Wählen Sie bitte die zutreffendste Antwort:

|              |   |     |                       |                          |                     |            |
|--------------|---|-----|-----------------------|--------------------------|---------------------|------------|
| Wie oft ...? | > | nie | selten<br>(<1x/Monat) | manchmal<br>(1-3x/Monat) | oft<br>(1-2x/Woche) | fast immer |
|--------------|---|-----|-----------------------|--------------------------|---------------------|------------|

Für die Beantwortung einiger Fragen benötigen Sie womöglich die Hilfe Ihres Lebenspartners oder einer anderen Ihnen nahestehenden Person. Grundsätzlich beziehen sich die Fragen auf **die letzten 6 Monate**.

Name:

Vorname:

Geburtsdatum:

Heutiges Datum:

Unterschrift:

Mit meiner Unterschrift erkläre ich mich damit einverstanden, dass die Informationen aus diesem Fragebogen und der Resultate der weiteren durchgeführten Untersuchungen in anonymisierter Form zu wissenschaftlichen Zwecken verwendet werden dürfen.

WfI-daten\Inos\_forschungen\WOS-Schlaflabor\Allgemein\Handbuch\Vorlagen\Klinik\Fragebogen\Fragebogen\_Schlaf\_de\_21.04.10.doc  
Version vom 21.04.2010

1



## A Einführung

A.1 Haben Sie ein Schlafproblem? 8

nein  ja

wenn ja, welches? \_\_\_\_\_

A.2 Stört sie etwas am Tag während der Wachphase (z.B. Müdigkeit, Schläfrigkeit)?

nein  ja

wenn ja, was? \_\_\_\_\_

*Falls Sie auf eine der vorherigen Fragen mit "ja" geantwortet haben, beantworten Sie bitte ebenfalls die restlichen Fragen auf dieser Seite. Andernfalls fahren Sie bitte auf der nächsten Seite "B Allgemeines zum Schlaf" fort.*

A.3 Seit wie vielen Jahren besteht das Problem? \_\_\_\_\_ Jahre

A.4 Bestand ein bestimmter Auslöser für das Problem? 10

nein  ja

wenn ja, was war der Auslöser?  
\_\_\_\_\_

A.5 Wurde das Problem bereits einmal ärztlich untersucht?

nein  ja

Falls ja, welche Untersuchungen wurden durchgeführt?  
\_\_\_\_\_

Welche Diagnose(n) wurde(n) dabei gestellt?  
\_\_\_\_\_

A.6 Was ist/war die Behandlung Ihrer Schlaf- oder Wach-Probleme? 11

- keine Behandlung
- Medikamente
- andere Massnahmen

WI-daten\Inos\_forschungen\WOS-Schlaflabor\Allgemein\Handbuch\Vorlagen Klinik\Fragebogen\Fragebogen\_Schlaf\_de\_21.04.10.doc  
Version vom 21.04.2010

2

## B Allgemeines zum Schlaf

B.1 Um welche Zeit gehen Sie durchschnittlich zu Bett? 1

Während der Woche  :  Uhr

Am Wochenende  :  Uhr

B.2 Um welche Zeit stehen sie in der Regel auf? 2

Während der Woche  :  Uhr

Am Wochenende  :  Uhr

B.3 Wie viele Stunden **schlafen** Sie ungefähr pro Nacht (nicht Bettliegezeit)? 3

\_\_\_\_\_ Stunden

B.4 Schlafen Sie  eher tief  eher oberflächlich ? 6

B5. Zeichnen Sie bitte auf der folgenden Linie Ihre durchschnittliche Schlafqualität ein:

*sehr schlecht*

*sehr gut*

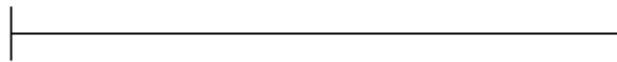

Beispiel: "Ihre Schlafqualität ist durchschnittlich"

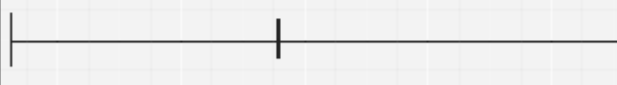

B.6 Sind Ihre Bettgehzeiten unregelmässig? 7  
(Schwankungen der Bettgehzeit um 3-4 Stunden)  ja  nein

Wenn ja, warum?  Arbeit  Freizeit  Schlafprobleme

B.7 Sind Sie ein  Morgentyp  Nachttyp  weder noch ? 5

## C Einschlafen, Durchschlafen und Aufwachen

- C.1 Wie oft können Sie nicht einschlafen? (ohne Schlafmedikamente) 12  
(Haben Sie Probleme einzuschlafen?)  
 nie  selten  manchmal  oft  fast immer
- C.2 Wie lange brauchen Sie im Durchschnitt zum Einschlafen (in Minuten)? 13  
 >40  31-40  21-30  10-20  <10
- C.3 Wie oft können Sie nicht durchschlafen(ohne Schlafmedikamente)? 14  
(Wachen Sie in der Nacht auf?)  
 nie  selten  manchmal  oft  fast immer
- C.4 Wie viele Male wachen Sie im Durchschnitt pro Nacht auf (ohne gleich wieder einschlafen zu können)? 15
- Warum?  Wasser lösen  
 Aus anderen Gründen: \_\_\_\_\_  
 Ohne spezielle Gründe (einfach so)
- C.5 Wie oft wachen Sie am Morgen zu früh auf (ohne wieder einschlafen zu können)? 16  
 nie  selten  manchmal  oft  fast immer
- C.6 Wie oft fühlen Sie sich am Morgen schlecht / unausgeschlafen? 58  
 nie  selten  manchmal  oft  fast immer
- C.7 Wie oft passiert es, dass Sie am Morgen verwirrt (wie betrunken) sind? 60  
 nie  selten  manchmal  oft  fast immer
- C.8 Brauchen Sie in der Regel Hilfsmittel um am Morgen aufzuwachen? 56  
 nein  ein Wecker  mehrere Wecker  Zweitperson

## D Atmung und Kreislauf

- D.1 Wie oft schnarchen Sie laut und störend? 18  
 nie  selten  manchmal  oft  fast immer
- D.2 Wie oft setzen Sie in der Nacht mit der Atmung aus (Bettpartner/in fragen oder schätzen)? 19  
 nie  selten  manchmal  oft  fast immer
- D.3 Wie oft sind Sie mit dem Gefühl der Atemnot oder der Beklemmung auf der Brust aufgewacht oder aufgeschreckt? 20  
 nie  selten  manchmal  oft  fast immer
- D.4 Wie oft schwitzen Sie stark in der Nacht? 21  
 nie  selten  manchmal  oft  fast immer
- D.5 Wie oft ist im Schlaf Ihre Nasenatmung blockiert? 22  
 nie  selten  manchmal  oft  fast immer
- D.6 Haben sie einen hohen Blutdruck? 23  
 nein  eher nicht  weiss nicht  eher ja  ja
- D.7 Ist Ihr Schnarchen lauter wenn Sie auf dem Rücken schlafen? 24  
 nein  eher nicht  weiss nicht  eher ja  ja
- D.8 Ist Ihr Schnarchen lauter wenn Sie Alkohol trinken? 25  
 nein  eher nicht  weiss nicht  eher ja  ja
- D.9 Wie viel wiegen Sie?  kg Wie gross sind Sie?  cm 26  
 <61  61-72  72-82  82-94  >94 kg
- D.10 Wie viele Jahre haben Sie geraucht? 27  
 nie  1  2-12  13-25  >25
- D.11 Ihr Alter? 28  
 <26  26-35  36-44  45-50  >50

## E Parasomnien und Träume

- E.1 Kommt oder kam es vor, dass Sie als Erwachsener schlafwandeln? 34  
 nie  selten  manchmal  oft  fast immer
- E.2 Sprechen oder schreien sie im Schlaf? 39  
 nie  selten  manchmal  oft  fast immer
- E.3 Kommt es zu Beschimpfungen oder gar Gewalttätigkeiten im Schlaf? 42  
 nie  selten  manchmal  oft  fast immer
- E.4 Essen oder trinken Sie unbewusst im Schlaf? 38  
 nie  selten  manchmal  oft  fast immer
- E.5 Knirschen sie mit den Zähnen? 40  
 nie  selten  manchmal  oft  fast immer
- E.6 Haben Sie ein unangenehmes brennendes, beissendes oder kribbelndes Gefühl in den Beinen, welches Sie zwingt, die Beine zu bewegen oder zu reiben oder aufzustehen? 43  
 nie  selten  manchmal  oft  fast immer
- E.7 Haben sie in der Nacht Wadenkrämpfe oder Muskelkrämpfe? 33  
 nie  selten  manchmal  oft  fast immer
- E.8 Passiert es, dass Sie das Bett im Schlaf nässen? 54  
 nie  selten  manchmal  oft  fast immer
- E.9 Für Männer: Passiert es, dass Sie im Schlaf schmerzhafte Erektionen haben? -  
 nie  selten  manchmal  oft  fast immer
- E.10 Können sie sich oft an Träume erinnern? 50  
 nie  selten  manchmal  oft  fast immer
- E.11 Hat sich die Art des Träumens (Anzahl, Inhalt) in letzter Zeit verändert? 50  
 nein  schwach  mässig  stark  sehr stark

E.12 Haben Sie oft Alpträume, d.h. Angst- oder Horrorträume? 52

nie  selten  manchmal  oft  fast immer

E.13 Haben Sie beim Einschlafen oder Aufwachen (am Übergang zwischen Wachsein und Schlaf) manchmal das Gefühl von: 47a/45

- traumähnlichen Erlebnissen/Halluzinationen (z.B. dass jemand sich in Ihrem Zimmer befindet)?

nie  selten  manchmal  oft  fast immer

- gelähmt zu sein (nichts bewegen zu können)?

nie  selten  manchmal  oft  fast immer

## F Müdigkeit und Schläfrigkeit

F.1 Fühlen Sie sich oft während des Tages müde, ohne Energie, erschöpft? 62

nie  selten  manchmal  oft  fast immer

F.2 Durch körperliche Betätigung erhöht sich meine Müdigkeit.

nie  selten  manchmal  oft  fast immer

F.3 Zeichnen Sie bitte auf der folgenden Linie Ihre durchschnittliche Tagesmüdigkeit ein:

*sehr müde* *sehr wach*  
|-----|

F.4 Wie oft fühlen Sie sich schläfrig (müssen gegen das Einnicken/ Einschlafen kämpfen)? 64

nie  selten  manchmal  oft  fast immer

F.5 Haben Sie schon Unfälle erlitten oder verursacht, weil Sie ungewollt eingeschlafen sind? 71

ja  nein

F.6 Haben Sie schon *beinahe* Unfälle erlitten oder verursacht, weil Sie ungewollt eingeschlafen sind? 71

ja  nein

F.7 Passiert es oft, dass Sie Dinge tun, die keinen Sinn haben (z.B. Salz in den Kaffee, unverständliches Schreiben, Fahren zum falschen Ort)? 72

nie  selten  manchmal  oft  fast immer

F.8 Wie oft machen Sie ein Mittagsschlaf / Nickerchen? 65

nie  würde gerne  1-2x/ Woche  3-5x/ Woche  fast täglich

F.9 Wie oft passiert es, dass Sie in den folgenden Situationen einnicken oder einschlafen? Wenn Sie gewisse Situationen nicht erlebt haben, versuchen Sie sich bitte vorzustellen wie es Ihnen dabei ergangen wäre. 73

|                                                                   | nie                      | selten                   | gelegentlich             | oft                      |
|-------------------------------------------------------------------|--------------------------|--------------------------|--------------------------|--------------------------|
| Lesen (sitzend)                                                   | <input type="checkbox"/> | <input type="checkbox"/> | <input type="checkbox"/> | <input type="checkbox"/> |
| beim Fernsehen                                                    | <input type="checkbox"/> | <input type="checkbox"/> | <input type="checkbox"/> | <input type="checkbox"/> |
| an öffentlichem Ort inaktiv sitzend (z.B. Theater, Konferenz)     | <input type="checkbox"/> | <input type="checkbox"/> | <input type="checkbox"/> | <input type="checkbox"/> |
| als Beifahrer im Auto (> 1 Stunde ohne Unterbrechung)             | <input type="checkbox"/> | <input type="checkbox"/> | <input type="checkbox"/> | <input type="checkbox"/> |
| beim Hinlegen am Nachmittag                                       | <input type="checkbox"/> | <input type="checkbox"/> | <input type="checkbox"/> | <input type="checkbox"/> |
| sitzen und sich mit jemandem unterhalten                          | <input type="checkbox"/> | <input type="checkbox"/> | <input type="checkbox"/> | <input type="checkbox"/> |
| nach dem Mittagessen ruhig sitzend (ohne Alkohol)                 | <input type="checkbox"/> | <input type="checkbox"/> | <input type="checkbox"/> | <input type="checkbox"/> |
| im Auto beim Stopp an einer Verkehrsampel während einigen Minuten | <input type="checkbox"/> | <input type="checkbox"/> | <input type="checkbox"/> | <input type="checkbox"/> |

F.10 Wie oft schlafen Sie ungewollt in diesen Situationen ein? 70

|                                | nie                      | selten                   | manchmal                 | oft                      | fast immer               |
|--------------------------------|--------------------------|--------------------------|--------------------------|--------------------------|--------------------------|
| Lesen (1)                      | <input type="checkbox"/> |
| Fahren (im Zug, Beifahrer) (2) | <input type="checkbox"/> |
| Stehen (3)                     | <input type="checkbox"/> |
| Essen (4)                      | <input type="checkbox"/> |
| andere Situationen (5)         | <input type="checkbox"/> |

Beispiele: \_\_\_\_\_

|                     |                          |                          |                          |                          |                          |
|---------------------|--------------------------|--------------------------|--------------------------|--------------------------|--------------------------|
| Fahren (selber) (6) | <input type="checkbox"/> |
| im Gespräch (7)     | <input type="checkbox"/> |

Ullianlinna Narcolepsy Scale:  
Swiss Narcolepsy Scale:  
Sleep Propensity in Active Situations:

Fragen C2, F6, F8 (1-5), G1  
Fragen C1, B8, F6, G1 (1+2)  
Frage F8 (3, 4, 6, 7)

## G Kataplexie

G.1 Bei Emotionen wie Lachen, Freude oder Wut, haben Sie schon einmal <sup>75</sup> folgende Beschwerden empfunden?

Weiche Knie / Knieschlottern <sup>(1)</sup>

nie  selten  manchmal  oft  fast immer

Absinken des Unterkiefers <sup>(2)</sup>

nie  selten  manchmal  oft  fast immer

Vorfallen des Kopfes <sup>(3)</sup>

nie  selten  manchmal  oft  fast immer

Sturz <sup>(4)</sup>

nie  selten  manchmal  oft  fast immer

G.2 Erleben Sie **zur Zeit** Episoden mit Schwäche der Beine, weichen Knien, verwaschener Sprache, Absinken des Unterkiefers, Vorfallen des Kopfes oder der Schultern, Stürzen, wenn Sie

einen Witz erzählen oder hören?  ja  nein

lachen?  ja  nein

wütend sind?  ja  nein

## H Psyche und Lebensqualität

H.1 Fühlen Sie sich oft nervös, reizbar oder "gestress"? <sup>81</sup>

nie  selten  manchmal  oft  fast immer

H.2 Fühlen Sie sich oft traurig, niedergeschlagen oder deprimiert? <sup>82</sup>

nie  selten  manchmal  oft  fast immer

H.3 Beeinträchtigen ihre gesundheitlichen oder psychischen Probleme Ihre Lebensqualität (Familie, Beruf, Freizeit etc.)? <sup>-</sup>

nie  selten  manchmal  oft  fast immer

H.4 Wie oft haben Sie Kopfschmerzen? <sup>83</sup>

nie  selten  manchmal  oft  fast immer



## I Varia

- I.1 Was arbeiten (bzw. arbeiteten) Sie? \_\_\_\_\_  
Zu wieviel Prozent? \_\_\_\_ % 80
- I.2 Arbeiten (bzw. arbeiteten) Sie Schicht? 81  
 ja  nein  
Wenn ja: Bitte kurze Beschreibung: \_\_\_\_\_
- I.3 Nehmen Sie regelmässig Medikamente ein? 86  
 ja  nein  
 Herzbeschwerden/Blutdruck  Lungenerkrankung/Asthma  
 Allergien  Stimmung/Psychologie/Angst  
 Schilddrüsenprobleme  Schlafmittel  
 weiss nicht  
Bitte Namen: \_\_\_\_\_  
\_\_\_\_\_
- I.4 Nehmen Sie Schlafmittel? 87  
 nie  selten  manchmal  oft  fast immer  
Wenn ja: Bitte Namen:
- I.5 Wie viel Tassen Kaffee oder Tee trinken Sie pro Tag? \_\_\_\_ Tassen 89
- I.6 Trinken Sie Alkohol? 88  
 nie  selten  manchmal  oft  fast immer  
Wenn ja: was? \_\_\_\_\_ Gläser / Tag
