# Supplementary material
Source: PubMed Central journal article supplement (PMC5833497)
Supplement: jamaneurol-75-114-s002.pdf [file jamaneurol-75-114-s002.pdf]

## Supplementary Online Content

Bücheler F, Hackius M, Schreglmann SR, et al. Sodium oxybate for excessive daytime sleepiness and sleep disturbance in Parkinson disease: a randomized clinical trial. *JAMA Neurol*. Published online November 6, 2017.

doi:10.1001/jamaneurol.2017.3171

**eTable 1.** Baseline Characteristics and Final Dosages of Study Medications

**eTable 2.** Effect of Sodium Oxybate and Placebo on Daytime Vigilance, Nighttime Sleep, Parkinson Disease Symptoms

This supplementary material has been provided by the authors to give readers additional information about their work.

eTable 1. Baseline Characteristics and Final Dosages of Study Medications

Abbreviations: UPRDS, Unified Parkinson's disease rating scale; ESS, Epworth sleepiness scale; PDSS-2, Parkinson's disease sleep scale-2; SO, sodium oxybate.

|                                                                                       | All patients<br>(n=12) | Placebo –<br>SO<br>(n=6) | SO –<br>Placebo<br>(n=6) |
|---------------------------------------------------------------------------------------|------------------------|--------------------------|--------------------------|
| <b>Baseline characteristics</b>                                                       |                        |                          |                          |
| Age, y (SD)                                                                           | 62 (11.1)              | 57 (12.2)                | 67 (7.4)                 |
| Sex, M/F                                                                              | 10/2                   | 5/1                      | 5/1                      |
| Disease duration, y (SD)                                                              | 8.4 (4.6)              | 6.7 (4.1)                | 10.2 (4.6)               |
| Hoehn & Yahr St 2/3                                                                   | 4/8                    | 3/3                      | 1/5                      |
| UPDRS III in OFF at baseline (SD)                                                     | 29.8 (11.5)            | 27.2 (7.8)               | 32.3 (14.6)              |
| ESS at baseline (SD)                                                                  | 14.3 (2.3)             | 14.2 (2.6)               | 14.5 (2.3)               |
| PDSS at baseline (SD)                                                                 | 17.6 (5.1)             | 18.5 (6.9)               | 16.7 (2.8)               |
| Medical treatment, number of patients<br>(average L-dopa equivalent dose, mg<br>± SD) |                        |                          |                          |
| L-Dopa                                                                                | 12<br>(610 ± 273)      | 6<br>(536 ± 206)         | 6<br>(683 ± 330)         |
| Dopamine agonist                                                                      | 8<br>(168 ± 181)       | 4<br>(96 ± 95)           | 4<br>(240 ± 224)         |
| Amantadine / COMT / MAO-B<br>inhibitor                                                | 2 / 2 / 5              | 1 / 2 / 3                | 1 / 0 / 2                |
| Total L-Dopa equivalent dose                                                          | 778 ± 312              | 632 ± 177                | 923 ± 363                |
| <b>Study medications</b>                                                              |                        |                          |                          |
| Final dose SO, g (SD)                                                                 | 4.8 (1.5)              | 5 (0.8)                  | 4.7 (2.0)                |
| Final dose Placebo, g (SD)                                                            | 8.7 (0.6)              | 8.5 (0.8)                | 9.0 (0)                  |

eTable 2. Effect of Sodium oxybate and Placebo on Daytime Vigilance, Nighttime Sleep, Parkinson Disease Symptoms

Abbreviations: MSL, mean sleep latency; MSLT, multiple sleep latency test; ESS, Epworth sleepiness scale; FSS, fatigue severity scale; PDSS-2, Parkinson's disease sleep scale-2; N1-3, superficial to deep non-rapid eye movement sleep; REM, rapid eye movement; AHI, apnea-hypopnea index; UPDRS, Unified Parkinson's disease rating scale; PDQ-39, Parkinson's Disease Questionnaire.

Baseline values, treatment outcomes and treatment-related changes (standard deviation) are given for each study medication separately (statistical post-hoc analysis with Wilcoxon signed ranks test for differences, \* $P < .05$ , \*\* $P < .01$ , \*\*\* $P < .001$ , left columns). Treatment effects (sodium oxybate versus placebo) as derived from linear mixed model analysis are given with confidence interval (CI) and corresponding  $P$ -values (treatment effect, right columns) for intention-to-treat (ITT) and per-protocol (PP) population.

1

|                                      | Sodium Oxybate (n=12) |                |             | Placebo (n=12) |                |             | Treatment effect             |               |                              |               |
|--------------------------------------|-----------------------|----------------|-------------|----------------|----------------|-------------|------------------------------|---------------|------------------------------|---------------|
|                                      | Baseline (SD)         | Treatment (SD) | Change (SD) | Baseline (SD)  | Treatment (SD) | Change (SD) | Effect ITT (95% CI)          | P value (ITT) | Effect PP (95% CI)           | P value (PP)  |
| <b>Daytime vigilance</b>             |                       |                |             |                |                |             |                              |               |                              |               |
| MSL in MSLT, min                     | 3.1 (3.2)             | 5.3 (5.1)      | 2.2 (2.6)*  | 3.7 (2.8)      | 2.9 (2.9)      | -0.7 (1.1)  | <b>2.9 (2.1-3.8)</b>         | <b>0.002</b>  | <b>3.5 (2.6-4.4)</b>         | <b>0.0007</b> |
| ESS                                  | 13.3 (2.5)            | 9.3 (2.9)      | -4 (3.6)*** | 12.5 (2.2)     | 12.6 (2.6)     | 0.2 (1.5)   | <b>-4.2 (-5.3-[-3.0])</b>    | <b>0.001</b>  | <b>-5.2 (-6.4-[-4.0])</b>    | <b>0.0002</b> |
| FSS                                  | 4.1 (1.0)             | 4.1 (1.0)      | 0 (1.0)     | 4.3 (1.1)      | 4.2 (0.8)      | -0.1 (0.9)  | 0.01 (-0.86-1.3)             | 0.97          | 0.1 (-0.3-0.6)               | 0.81          |
| <b>Nighttime sleep</b>               |                       |                |             |                |                |             |                              |               |                              |               |
| <i>Subjective measures</i>           |                       |                |             |                |                |             |                              |               |                              |               |
| PDSS-2 complete                      | 16.6 (3.6)            | 12.8 (4.7)     | -3.8 (4.7)* | 17.5 (5.2)     | 15.8 (3.3)     | -1.5 (3.4)  | -2.2 (-3.9-[-0.5])           | 0.21          | <b>-4.2 (-5.7-[-2.7])</b>    | <b>0.01</b>   |
| PDSS-2 questions 1-3                 | 5.3 (1.5)             | 3.7 (2.1)      | -1.6 (2.3)  | 5.4 (1.7)      | 5.8 (1.5)      | 0.4 (1.3)   | <b>-2.0 (-2.8-[-1.2])</b>    | <b>0.016</b>  | <b>-2.8 (-3.6-[-2.0])</b>    | <b>0.001</b>  |
| <i>Polysomnography</i>               |                       |                |             |                |                |             |                              |               |                              |               |
| N1, min                              | 62.7 (32)             | 44.2 (20)      | -18.5 (29)* | 74.2 (36)      | 77.9 (27)      | 3.7 (18)    | <b>-22.6 (-30.8-[-14.4])</b> | <b>0.03</b>   | <b>-22.5 (-31.7-[-13.2])</b> | <b>0.03</b>   |
| N2, min                              | 150.7 (38)            | 145.6 (43)     | -5.1 (50)   | 138.5 (48)     | 133.0 (47)     | -5.5 (36)   | 0.36 (-17.9-16.2)            | 0.98          | 12.9 (-5.1-30.8)             | 0.48          |
| N3, min                              | 60.0 (35)             | 119.0 (4)      | 58.9 (49)** | 56.9 (42)      | 43.1 (32)      | -13.8 (29)  | <b>72.7 (55.7-89.7)</b>      | <b>0.0002</b> | <b>58.5 (41.9-75.2)</b>      | <b>0.002</b>  |
| REM, min                             | 38.4 (35)             | 28.4 (27)      | -10 (25)    | 33.6 (20)      | 35.0 (34)      | 1.5 (32)    | -11.5 (-23.2-0.3)            | 0.33          | -11.2 (-24.1-1.8)            | 0.39          |
| WAKE, min                            | 104.9 (70)            | 83.7 (89)      | -21.1 (45)  | 116.1 (44)     | 128.5 (67)     | 12.4 (61)   | -33.5 (-55.8-[-11.3])        | 0.14          | -31.9 (-54.7-[-9.0])         | 0.17          |
| Arousal index, arousals/h            | 15.2 (5.3)            | 7.5 (2.9)      | -4.6 (4.2)* | 15.6 (9.9)     | 13.0 (5.2)     | -2.4 (5.7)  | -2.0 (-3.8-[-0.2])           | 0.27          | -1.8 (-3.7-0.2)              | 0.38          |
| Slow wave energy, mV <sup>2</sup> *s | 6.0 (4.0)             | 13.8 (8.9)     | 7.8 (7.4)   | 7.0 (7.2)      | 4.8 (4.2)      | -2.3 (4.5)  | <b>9.9 (7.3-12.5)</b>        | <b>0.0007</b> | <b>7.3 (5.3-9.3)</b>         | <b>0.001</b>  |
| AHI, apnea/h                         | 2.8 (3.4)             | 7.4 (8.3)      | 4.6 (9.2)   | 3.5 (4.0)      | 4.6 (5.1)      | 1.0 (5.4)   | 2.7 (0.2-5.2)                | 0.28          | -0.1 (-1.7-1.6)              | 0.96          |
| <b>Parkinson's disease symptoms</b>  |                       |                |             |                |                |             |                              |               |                              |               |
| Morning UPDRS III OFF                | 29.6 (11.0)           | 26.7 (10.9)    | -2.9 (4.4)  | 26.2 (8.9)     | 25.8 (8.7)     | -0.3 (7.7)  | -2.6 (-5.2-0.1)              | 0.34          | -3.9 (-6.4-[-1.4])           | 0.14          |
| PDQ-39                               | 34.5 (15.9)           | 31.9 (14.5)    | -2.6 (9.9)  | 34.2 (12.2)    | 28.4 (12.4)    | -5.9 (8.6)  | 3.1 (-0.5-6.8)               | 0.39          | 1.3 (-2.6-5.2)               | 0.74          |

2

3
